1 **Engaging Biological Oscillators through Second Messenger**  
2 **Pathways Permits Emergence of a Robust Gastric Slow-**  
3 **Wave during Peristalsis**

4 **Short Title:** Emergence of Robust Gastric Slow-Wave during Peristalsis

5 Md Ashfaq Ahmed<sup>1</sup>, Sharmila Venugopal<sup>2\*</sup>, Ranu Jung<sup>1\*</sup>

6 <sup>1</sup>Department of Biomedical Engineering, Florida International University, Miami, Florida,  
7 United States of America.

8 <sup>2</sup>Integrative Biology and Physiology, University of California Los Angeles, Los Angeles,  
9 California, United States of America.

10 \* Corresponding authors

11 E-mail: [RJung@fiu.edu](mailto:RJung@fiu.edu); [vsharmila@ucla.edu](mailto:vsharmila@ucla.edu)

12 **Conflict of Interest Statement:**

13 The authors declare no conflict of interest.

14 **Funding:**

15 MAA Ahmed was supported in part by the Wallace H Coulter Eminent Scholar  
16 Endowment to RJ and a Dissertation Year Fellowship, from the University Graduate  
17 School, Florida International University. The funders had no role in study design, data  
18 collection and analysis, decision to publish, or preparation of the manuscript.

19

20 **Data Availability Statement:**

21 The source code used to produce the results and analyses presented in this manuscript  
22 are available from GitHub repository [https://github.com/ashfaq-](https://github.com/ashfaq-polit/Slow_waves_in_the_stomach)  
23 [polit/Slow\\_waves\\_in\\_the\\_stomach](https://github.com/ashfaq-polit/Slow_waves_in_the_stomach)

24 **Keywords:**

25 Slow-wave, gastric motility, enteric, entrainment, coupled oscillators, gap junction, IP<sub>3</sub>

26 **Abstract**

27 Peristalsis, the coordinated contraction - relaxation of the muscles of the stomach is important for  
28 normal gastric motility and is impaired in motility disorders. Coordinated electrical depolarizations  
29 that originate and propagate within a network of interconnected layers of interstitial cells of Cajal  
30 (ICC) and smooth muscle (SM) cells of the stomach wall as a slow-wave, underly peristalsis.  
31 Normally, the gastric slow-wave oscillates with a single period and uniform rostrocaudal lag,  
32 exhibiting network entrainment. Understanding of the integrative role of neurotransmission and  
33 intercellular coupling in the propagation of an entrained gastric slow-wave, important for  
34 understanding motility disorders, however, remains incomplete. Using a computational framework  
35 constituted of a novel gastric motility network (GMN) model we address the hypothesis that  
36 engaging biological oscillators (i.e., ICCs) by constitutive gap junction coupling mechanisms and  
37 enteric neural stimulus activated signals can confer a robust entrained gastric slow-wave. We  
38 demonstrate that while a decreasing enteric neural stimulus gradient that modulates the  
39 intracellular IP<sub>3</sub> concentration in the ICCs can guide the aboral slow-wave propagation essential  
40 for peristalsis, engaging ICCs by recruiting the exchange of second messengers (inositol  
41 trisphosphate (IP<sub>3</sub>) and Ca<sup>2+</sup>) ensures a robust entrained longitudinal slow-wave, even in the  
42 presence of biological variability in coupling strengths. Our GMN with the distinct intercellular

43 coupling in conjunction with the intracellular feedback pathways and a rostrocaudal enteric neural  
44 stimulus gradient allows gastric slow waves to oscillate with a moderate range of frequencies and  
45 to propagate with a broad range of velocities, thus preventing decoupling observed in motility  
46 disorders. Overall, the findings provide a mechanistic explanation for the emergence of decoupled  
47 slow waves associated with motility impairments of the stomach, offer directions for future  
48 experiments and theoretical work, and can potentially aid in the design of new interventional  
49 pharmacological and neuromodulation device treatments for addressing gastric motility disorders.

## 50 **Author Summary**

51 The coordinated contraction and relaxation of the muscles of the stomach, known as peristalsis  
52 is important for normal gastric motility and primarily governed by electrical depolarizations that  
53 originate and propagate within a network of interconnected layers of interstitial cells of Cajal  
54 (ICCs) and smooth muscle cells of the stomach wall as a slow-wave. Under normal conditions, a  
55 gastric slow-wave oscillates with a single period and uniform rostrocaudal lag, exhibiting network  
56 entrainment. However, the understanding of intrinsic and extrinsic mechanisms that ensure  
57 propagation of a robust entrained slow-wave remains incomplete. Here, using a computational  
58 framework, we show that in conjunction with an enteric neural stimulus gradient along the  
59 rostrocaudal ICC chain, and intercellular electrical coupling, the intercellular exchange of inositol  
60 trisphosphate between ICCs prevents decoupling by extending the longitudinal entrainment range  
61 along the stomach wall, even when variability in intercellular coupling exists. The findings from  
62 our study indicate ways that ensure the rostrocaudal spread of a robust gastric slow-wave and  
63 provide a mechanistic explanation for the emergence of decoupled slow waves associated with  
64 motility impairments of the stomach.

65

66

67

## 68 **Introduction**

69 Gastric peristalsis, the coordinated contraction and relaxation of the muscles of the stomach, is a  
70 critical phenomenon for food propulsion and waste product elimination [1] and is impaired in  
71 motility disorders [2–4]. The coordination of the contractions along the rostrocaudal compartments  
72 of the stomach causes rhythmic longitudinally travelling aboral muscle contractions [5].  
73 Sometimes in motility disorders, the contractions can occur at a faster rate than the usual  
74 (tachygastric) or at a slower rate (bradygastric) [4,6]; whereas in some cases the rostrocaudal  
75 coordination of contractions is lost resulting in decoupling (the activity of the caudal end and the  
76 rostral end become independent of each other) or functional uncoupling (the activity of the caudal  
77 end controlling the activity of the rostral end [7,8]) of contractions in the stomach [9]. Events like  
78 these have been associated with gastric motility disorders such as gastroparesis (delay in food  
79 transit), functional dyspepsia and gastroesophageal reflux disease [4,6,10].

80 Peristalsis is governed by diverse and overlapping mechanisms which normally ensure robust  
81 motility patterns. Peristalsis emerges from a mutually coupled chain of pacemaker cells called the  
82 interstitial cells of Cajal (ICCs). The ICCs can independently generate electrical activity known as  
83 pacemaker potentials, which drive rhythmic potentials in the circular and longitudinal smooth  
84 muscle (SM) cells embedded in the stomach wall [5,11–13]. The electrical activity propagates  
85 through this network of cells in a coordinated manner resulting in gastric slow-wave (GSW)  
86 propagation [13,14] that underlies peristalsis.

87 The propagation is enabled in part by gap junction channels between the ICCs, between ICCs  
88 and SM cells, as well as between SM cells [15–17]. The SM cells, lacking intrinsic pacemaker  
89 capability, do not regenerate the slow-wave. Regeneration of the gastric slow-wave instead  
90 occurs within the pacemaker ICCs. Without coordinated ICC-ICC interactions, gastric slow-wave  
91 events do not propagate long distances [18]. Therefore, understanding how coordination arises

92 between ICCs for propagating the gastric slow-wave is critical for understanding abnormal  
93 peristalsis that is present in gastric motility disorders.

94 A causal relationship between electrical gap-junction coupling in a network of ICCs and the  
95 emergent gastric slow-wave has been unequivocally demonstrated by computational studies  
96 (e.g., [7,8,19]). Pacemaker ICCs contain calcium ( $\text{Ca}^{2+}$ ) and inositol 1,4,5- trisphosphate ( $\text{IP}_3$ )  
97 within their cytoplasm [20,21]. Gap junctions also facilitate exchange of second messengers such  
98 as  $\text{Ca}^{2+}$  and  $\text{IP}_3$  between adjacent cells [22–25]. Such exchange of  $\text{Ca}^{2+}$  and  $\text{IP}_3$  can impact  
99 intracellular concentration of  $\text{Ca}^{2+}$  and  $\text{IP}_3$  within pacemaker cells and therefore, can modulate the  
100 oscillation frequency of the concerned cell. In addition, the intracellular concentration of  $\text{IP}_3$  is  
101 modulated by the enteric neural stimuli received by the ICC [26–29]. Therefore, understanding  
102 the role of second messengers and their neural control is likely important for understanding  
103 aberrations in slow-wave propagation that result in the emergence of gastric motility disorders.

104 The longitudinally arranged ICCs along the stomach wall with intercellular gap junctions, resemble  
105 a chain of coupled oscillators [30,31]. In such a chain, the rostral or leading oscillator can gradually  
106 engage the trailing oscillators along the chain such that, at a steady-state, all the oscillators are  
107 frequency and phase-locked, with a constant phase lag between consecutive oscillators [32–34].  
108 This phenomenon known as oscillator entrainment is thought to be the basis for the GSW in the  
109 stomach [30,31]. The integrative role of neurotransmission and intercellular coupling mechanisms  
110 in GSW entrainment remain incompletely understood. To distinguish the intercellular exchange  
111 of second messengers from passive electrical conductance is empirically challenging due to lack  
112 of pharmacological or genetic tools. The second messengers, including  $\text{Ca}^{2+}$  and  $\text{IP}_3$  that can  
113 move passively via gap junctions [22,23,25,35,36], are involved in intercellular communication via  
114 a spatiotemporal spread of coordinated oscillations in gap-junction coupled networks  
115 [22,23,25,35–37] and can increase the GSW frequency [38]. Yet, it is not clear whether their

116 intercellular gap junction permeabilities can enable regenerative movement from the leading to  
117 the trailing ICCs to entrain cells and thus facilitate propagation of the slow-wave [8,18].

118 Our objectives were therefore to first develop a computational framework which includes  
119 constitutive stomach wall cells, biophysical models of the cells, gap junctions through which  
120 electrical coupling exists, second messenger exchange across gap junctions, and modulation of  
121 second messenger concentration by an endogenous enteric neural stimulus. Second, we utilized  
122 this framework to assess the contribution of intercellular electrical coupling and intercellular  
123 exchange of second messengers on longitudinal entrainment of the gastric slow-wave.

124 To develop a computational framework, we created a gastric motility network (GMN). We modeled  
125 realistic cell models for ICCs incorporating the intrinsic mechanisms for pacemaker potential  
126 generation (or oscillatory) activity. To enable inter-ICC coordination, we modeled electrical  
127 coupling and second messenger ( $IP_3$  and  $Ca^{2+}$ ) exchange between adjacent cells in a chain. Each  
128 ICC was also coupled to an SM cell, forming a pacemaker unit. The membrane voltage and period  
129 (or frequency) of the SM cells were used to assess network entrainment, as in empirical studies.  
130 Further, we set a rostrocaudal gradient for the enteric neural stimulus input to the ICCs along the  
131 ICC chain.

132 Since enteric neural stimulation influences the intracellular second messenger concentration, we  
133 first evaluated the importance of a gradient in the stimulus along the chain for development of a  
134 caudally propagating gastric slow-wave. We hypothesized that a linear gradient would enable  
135 gastric slow-wave propagation along the chain. Next, we examined whether exchange of second  
136 messengers alone can generate propagation of the gastric slow-wave. We hypothesized that  
137 addition of exchange of second messengers to electrical coupling would enhance the length of  
138 the oscillator chain over which entrainment is preserved (referred to as *entrainment range*  
139 hereafter). When the oscillators spanning the rostral end of the chain to the caudal end of the

140 chain are entrained, we refer to the phenomena as rostrocaudal entrainment and if the entrained  
141 region spans a certain length from the rostral end, but falls short of the caudal end, we considered  
142 it partial entrainment. We also assessed how changing electrical coupling strength and second  
143 messenger permeability influenced the pacemaker potential frequency and the time for the slow-  
144 wave to propagate from the rostral to the caudal end of the stomach, i.e. the velocity of the slow-  
145 wave. We hypothesized that systematic increase in coupling strengths would both increase the  
146 pacemaker potential frequency and reduce the time taken for gastric slow-wave propagation.  
147 Finally, we hypothesized that variability in coupling strengths from cell-to-cell would not disrupt  
148 longitudinal entrainment if both electrical coupling and second messenger exchange mechanisms  
149 are present.

150 A novel computational framework with both pacemaker and muscle cells that includes intercellular  
151 exchange of second messengers and where the pacemakers receive a neural stimulus was  
152 developed to simulate and understand propagation of the slow-wave in the stomach. The results  
153 indicate that a gradient of neural modulation along the ICCs is necessary for gastric slow-wave  
154 propagation and its presence controls the directionality of the propagating slow-wave in an  
155 entrained network. Although intercellular exchange of second messengers is not necessary for  
156 slow-wave propagation, its presence can enhance the rostrocaudal length of the stomach over  
157 which entrainment is preserved and, in its absence, the entrainment range is compromised (partial  
158 entrainment is observed). This compromise is reflected by signs of decoupled slow waves and  
159 bradygastria. As hypothesized, on an increase of electrical coupling strength and second  
160 messenger permeability, the velocity of slow-wave propagation increased while the pacemaker  
161 potential frequency increased with the former and decreased with the latter. Our model with the  
162 distinct intercellular mechanisms (exchange of second messengers and electrical coupling) in  
163 combination with the intracellular feedback pathways and a rostrocaudal neural stimulus gradient  
164 allows SM cells to oscillate with a moderate range of frequencies and the gastric slow-wave to

165 propagate with a broad range of velocities. Importantly, in the presence of variability in coupling  
166 strengths as would occur in biological networks, the existence of intercellular exchange of  $IP_3$  can  
167 preserve the longitudinal entrainment to a greater extent along the length of the stomach and  
168 eliminate signs of bradygastria and/or tachygastria. Together these results enhance our  
169 understanding of the intrinsic and extrinsic mechanisms engaging second messengers for the  
170 propagation of a robust gastric slow-wave essential for normal peristalsis.

171

## 172 **Results**

### 173 **A biologically realistic gastric motility network (GMN) model for the stomach**

174 To develop a gastric motility network (GMN) model for the stomach, we considered the length of  
175 the stomach spanning the mid-corpus to the terminal antrum. The schematic of the stomach in  
176 **Fig 1A** highlights the arrangement and diversity of cell-types in the stomach wall [11,12]. We  
177 focused on modeling the myenteric ICC and circular muscle layers which are most widely studied  
178 experimentally. The computational models for the ICCs and SM cells include a diverse set of  
179 biophysical properties reported in these cells [39–41] and are formulated as conductance-based  
180 models [42,43]. In the pacemaker ICCs, we incorporated widely accepted pathways for producing  
181 intrinsic oscillatory behavior. These included a cytosolic mitochondrial-endoplasmic reticulum  
182 (ER)-based  $Ca^{2+}$  buffering mechanism, a membrane potential dependent intracellular  
183 concentration change in  $IP_3$ , and  $IP_3$  receptor mediated  $Ca^{2+}$  release from the ER, in addition to  
184 the transmembrane voltage-activated ionic currents (see **Equations 3 and 4** in **Methods**) as  
185 shown in **Fig 1B** [20,41]. Whereas for the SM cell model, we included a muscle-specific  
186 sarcoplasmic-reticular mechanism of  $Na^+/Ca^{2+}$  exchange to moderate the intracellular  $Ca^{2+}$  in  
187 addition to the transmembrane currents as noted in **Fig 1C**. The ionic current equations defining  
188 the properties of these cells were derived from published models for the ICCs and SM cells (e.g.,  
189 [42,43]) and rely on relevant experimental work for the validity of the underlying model



190 assumptions (e.g., [39,40,44]). These cellular features were incorporated in our model to ensure  
 191 both biological compliance as well as agreement with published computational models (e.g.,  
 192 [7,19,42,43], see **S1 Table**). Our equations, parameter descriptions, and simulation methods are  
 193 described in the **Methods** section. The resulting simulated membrane voltage characteristics bear  
 194 close resemblance to empirical evidence, as shown in **Fig 1D (left, ICC pacemaker potential;**  
 195 **right, SM cell slow-wave potential)**. The intrinsic frequency of oscillations for both ICCs and SM  
 196 cells were tuned to ~3.0 cycles per minute to match closely with the membrane potential  
 197 recordings from the guinea-pig gastric antrum ICCs [5] and the canine antrum SM cells [40].

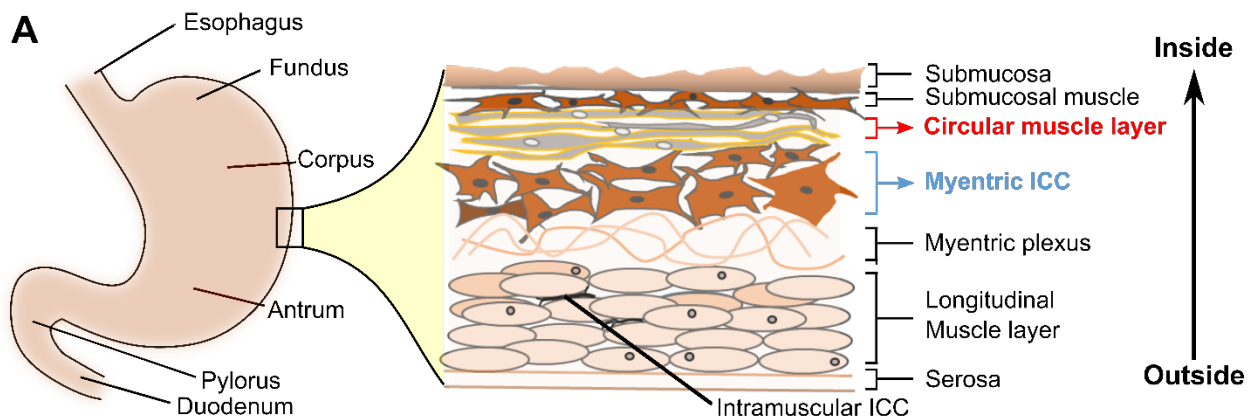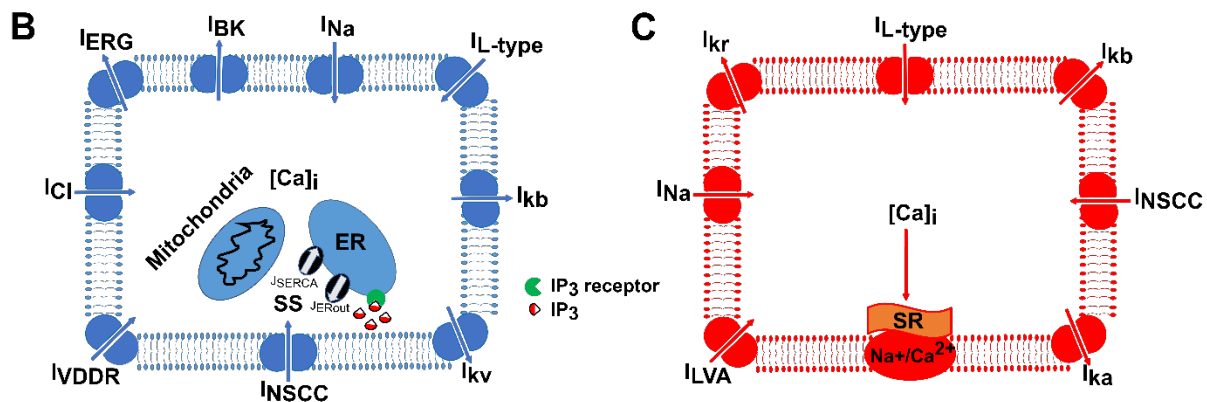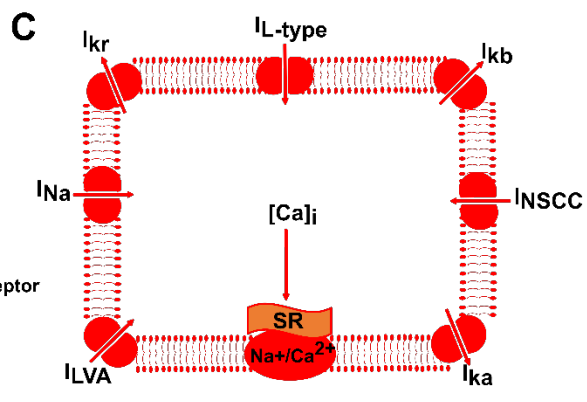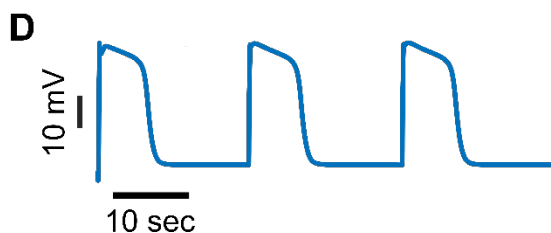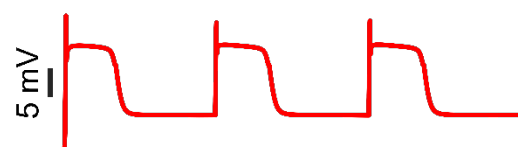

198

199 **Fig 1. Biophysical models for ICCs and SM cells involved in gastric motility.** Schematics showing (A)  
200 anatomical divisions of the stomach and the arrangement of various cell types in the stomach wall, (B)  
201 membrane ionic currents and intracellular  $\text{Ca}^{2+}$ - $\text{IP}_3$  components included in an interstitial cell of Cajal (ICC)  
202 model, and (C) membrane ionic currents in a smooth muscle (SM) cell model. See **Table 1** for symbols and  
203 details of ionic currents.  $[\text{Ca}]_i$  = Intracellular  $\text{Ca}^{2+}$ , ER= endoplasmic reticulum,  $\text{Na}^+/\text{Ca}^{2+}$  = Sodium/Calcium  
204 exchange pump, SR = Sarcoplasmic reticulum, SS = Submembrane space, (D) Simulated rhythmic  
205 membrane potential dynamics in an ICC (left panel) and an SM cell (right panel), respectively.

206 The gastric motility network architecture consists of a longitudinal chain of ICCs bordered by a  
207 similar inner chain of SM cells, with one-to-one connectivity formed through nearest-neighbor  
208 coupling as shown in **Fig 2**; This closely mimics their biological arrangement in the mammalian  
209 stomach [14,39,45]. Endogenously ICCs are coupled via gap junctions [15–17] which permit  
210 exchange of ions and other small molecules; We therefore incorporated both an electrical  
211 conductance and second messenger permeabilities, namely,  $\text{Ca}^{2+}$  and  $\text{IP}_3$ , between ICCs [22,23].  
212 Between each ICC and its connected SM cell, and between adjacent SM cells we incorporated  
213 electrical conductance-based coupling [15]. For the overall network, we incorporated 42 ICCs and  
214 42 SM cells formulated using >1500 ODEs and >2000 parameters. As such the network offers a  
215 complex, but realistic, framework to evaluate mechanisms involving ICC-ICC, SM-SM, and ICC-  
216 SM coupling and their contributions to inter-ICC coordination resulting in the GSW propagation.

217 **Fig 2** highlights the framework used to assess whether and how the intrinsic and extrinsic  
218 mechanisms engaging second messengers control the inter-ICC coordination necessary for  
219 generation of the GSW and thus, the *entrainment range* in this GMN. The enlarged box inset  
220 shows the intracellular pathways of the ICC model essential for its intrinsic oscillatory behavior or  
221 pacemaker activity. These consist of the multi-stage feedback pathway between the membrane  
222 potential,  $V_m$  and the intracellular  $\text{Ca}^{2+}$  and  $\text{IP}_3$  concentrations. The intracellular  $\text{Ca}^{2+}$  is further  
223 divided into two compartments:  $\text{Ca}^{2+}$  in the sub-space (SS) consisting of the ER and mitochondria

224 ( $[Ca]_{SS,i}$ ) and near membrane  $Ca^{2+}$  ( $[Ca]_i$ ). The bold arrows in the schematic show the inflows  
225 and outflows of the key model variables (see **Table 1** in **Methods** for description of the membrane  
226 ion channel currents). The dashed arrows with annotation highlight the positive feedback  
227 pathways important for intrinsic pacemaking in the ICC model. Note that the membrane potential  
228 exerts a positive feedback on intracellular  $IP_3$  concentration (see  $V_m - IP_3$  feedback in **Fig 2**,  
229 **Equation 4** in **Methods**, also [20,27,41]); The intracellular  $IP_3$  concentration,  $[IP_3]_i$ , in turn affects  
230 the  $[Ca]_{SS,i}$  concentration through the outward  $Ca^{2+}$  flux from the ER ( $J_{ERout}$ ) [46–48], as  
231 highlighted by the  $IP_3 - Ca^{2+}$  feedback in **Fig 2**. Lastly, the  $[Ca]_{SS,i}$  increases a non-selective  
232 cation channel current (NSCC) which closes the loop by impacting the membrane potential (the  
233  $Ca^{2+} - V_m$  feedback) [49,50].

234 An initiating event for pacemaker activity (enteric neural stimulus) is assumed to increase the  $IP_3$   
235 production rate and is modeled as a constant rate,  $\beta$ , for each ICC (see **Equation 4** in **Methods**).  
236 Biologically, increases in  $IP_3$  levels can originate from endogenous release of neurotransmitters  
237 from enteric neurons [26] and subsequent activation of G-protein coupled muscarinic receptors  
238 on ICCs at cholinergic synapses along the gastrointestinal (GI) tract [26,51]. In our model, we  
239 assume the neurotransmitter release and uptake by receptors as a single event termed as ‘enteric  
240 neural stimulus’. The enteric neural stimulus driven increase in  $[IP_3]$  results in an increase in the  
241  $[Ca]_{SS,i}$  mimicking the endogenous release of  $Ca^{2+}$  from  $IP_3$ -operated stores in the ER. In  
242 response to  $[Ca]_{SS,i}$  increase, the  $Ca^{2+}$  uniporter on the mitochondrial membrane is gated open,  
243 and  $Ca^{2+}$  ions flow into the mitochondria down the steep electrochemical gradient (the term  $J_{Uni}$   
244 in **Equation 3** in **Methods** represents this mechanism). This is thought to remove a larger number  
245 of  $Ca^{2+}$  ions from the subspace than had previously entered from the ER, causing a temporary  
246 drop in the subspace  $Ca^{2+}$  concentration [42,49,50]. This activates the non-selective cation  
247 channel current leading to membrane depolarization and onset of oscillation in the ICC.  
248 Subsequently, further increase in  $[Ca]_i$  due to opening of voltage-dependent  $Ca^{2+}$  channels is

249 followed by activation of voltage- and  $\text{Ca}^{2+}$ -dependent  $\text{K}^+$  currents to cause repolarization that  
250 restores  $V_m$  to hyperpolarized values. The above events repeat to cause the regenerative  
251 pacemaker potential activity.

252 To enable longitudinal entrainment of ICCs along the stomach's length with a rostrocaudal  
253 frequency gradient we set a rostrocaudal gradient for the enteric neural stimulus ( $\beta$ ) that  
254 modulates  $\text{IP}_3$  production along the ICC chain (see **Fig 2**). Such a gradient reflects evidence that  
255 cholinergic inputs to the ICCs show a rostrocaudal decrement along the GI tract [52,53].

256 The overall framework allowed us to examine whether engaging adjacent ICCs via two distinct  
257 mechanisms would result in similar entrained slow-wave. One mechanism relies on the electrical  
258 conductivity of the gap junction coupling between ICCs which *directly* depolarizes their membrane  
259 voltage during entrainment. This is a widely used formalism used in previous modeling studies  
260 [7,17]. The second mechanism based on exchange of  $\text{IP}_3$  and  $\text{Ca}^{2+}$  between adjacent ICCs has  
261 not been explored in previous models to examine the *entrainment range* (however see [8]). In our  
262 GMN model we also assume that exchange of second messengers between ICCs can occur via  
263 gap junctions [22–24]; the permeabilities are set for these small molecules (see **Equations 6 and**  
264 **7 in Methods**).

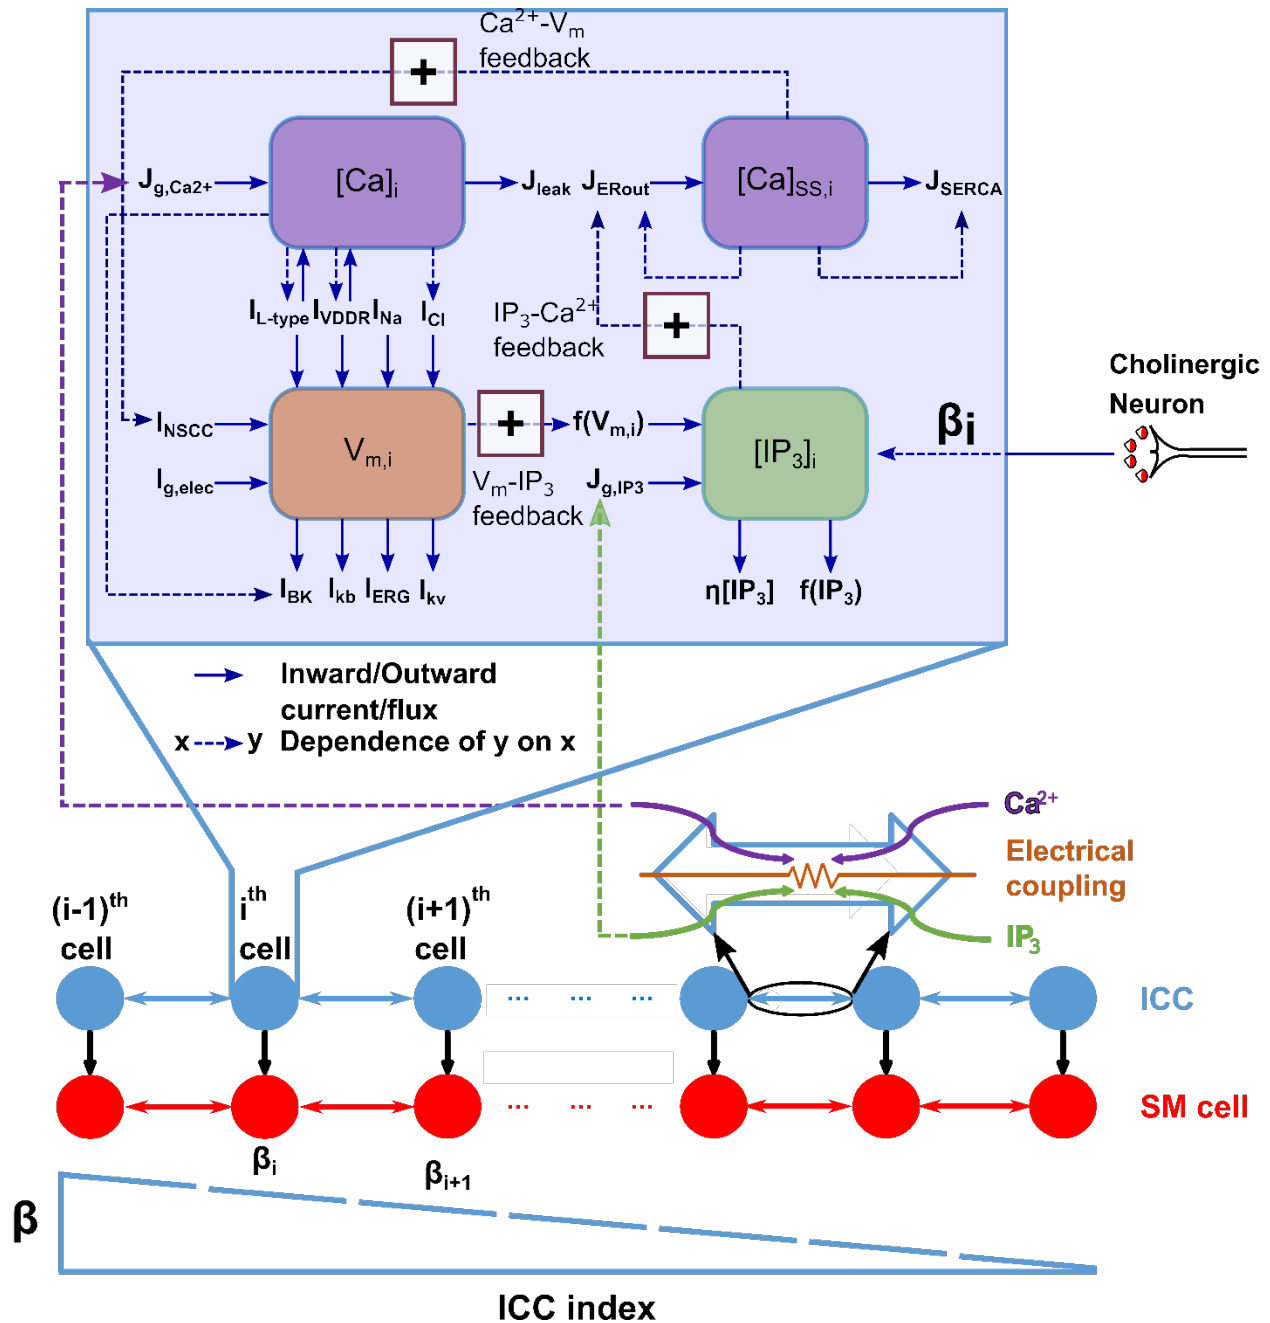

265

266 **Fig 2. Gastric Motility Network model architecture.** The GMN is constituted of a chain of nearest-  
 267 neighbor coupled interstitial cells of Cajal (ICC) and associated smooth muscle (SM) cells. The ICCs have  
 268 electrical and second messenger (Ca<sup>2+</sup> and IP<sub>3</sub>) based coupling, while the ICC to SM and SM to SM  
 269 couplings are only electrical. There is a negative gradient in enteric neural stimulus ( $\beta$ ) that modulates IP<sub>3</sub>  
 270 production rate along the rostrocaudal ICC chain (ICC index). Key variables and their interconnections  
 271 impacting the functionality of an ICC are illustrated in the enlarged inset. The bold arrows in the inset show

272 the inflows and outflows of key variables. The dashed arrows indicate dependency of the sink variable on  
273 the source variable. The dashed arrows with (+) sign highlight the positive feedback pathways important  
274 for intrinsic pacemaking by an ICC. See **Table 1** and text for further details.

### 275 **Longitudinal entrainment of ICCs produces a slow-wave for normal peristalsis**

276 We tested whether the GMN model can produce a slow-wave of uniform frequency similar to a  
277 rostrocaudally propagating slow-wave for normal peristalsis in the intact stomach (e.g., in the cat  
278 [45], in the dog [39], and guinea pig and humans [14]). We also examined whether the SM cells  
279 driven by the entrained ICCs exhibit the expected positive and constant time lags between  
280 adjacent cells from the rostral to the caudal end of the network [30,33,45,54]. The ICC/SM pair  
281 function as a pacemaker unit. We report the membrane potential of SM cells as a proxy for the  
282 pacemaker unit activity (also see **S8 Fig**) as is done in experimental work [45,55].

283 The network was simulated for 900 seconds, where steady-state entrainment was observed  
284 approximately after 300 seconds of transient response. **Fig 3** highlights the entrainment and the  
285 resulting slow-wave in the GMN at steady-state. In **Fig 3A**, a spatiotemporal map of the  
286 membrane potentials of the 42 SM cells demonstrates the rostrocaudal propagation of the slow-  
287 wave in the network. The grey shaded regions indicate the up-swing, and the black regions the  
288 down-swing in the membrane voltage of the SM cells. A single GSW cycle consists of successive  
289 phases of activity from the rostral to the caudal-most pacemaker units. In **Fig 3B**, we highlight the  
290 membrane potential of every 7<sup>th</sup> SM cell in the network. We define and measure *SM Cell Period*  
291 as the time between two consecutive peaks in the membrane voltage of an SM cell. An increase  
292 or decrease in the *SM Cell Period* reflects bradygastria and tachygastria, respectively. *Relative*  
293 *Lag* is defined as the time difference between the peak membrane voltage of SM<sub>1</sub> and SM<sub>i</sub>, where  
294  $i = 2,3,4...42$ , and *Total Lag* as the time between the peak membrane voltages of SM<sub>1</sub> and SM<sub>42</sub>  
295 and. Slow-wave velocity is inversely proportional to the *Total Lag*, provided that the *Total Lag*  
296 value reaches a constant value. At steady-state, *Relative Lags* should reach constant values

297 along the length of the network for a normal slow-wave exhibiting entrainment. Any deviation of  
298 *Relative Lag* from constancy reflects decoupling.

299 In our model, at steady-state, the average *SM Cell Period* over 7 slow-wave cycles for the  
300 boundary cells SM Cell 1 and SM Cell 42 were 17.7 ( $\pm$  s.d. = 0.01) seconds and 17.7 ( $\pm$  s.d. =  
301 0.01) seconds respectively. These periods match closely with those observed *in vitro* in studies  
302 of cat [45] and guinea pig stomach SM cells [14]). At steady-state, the computed *Total Lag*  
303 reached an approximately constant value of 20.8 ( $\pm$  s.d. 0.02) seconds (**Fig 3C**), and it was  
304 consistent between consecutive cycles. The *Relative Lag* for each cell reached an approximately  
305 constant value (**Fig 3D**) as well as the periods for all the SM cells in the network (observed from  
306 the spatiotemporal map of *SM Cell Periods* in **Fig 3E**). These results indicate the entrainment of  
307 all the pacemaker units to a uniform gastric slow-wave frequency.

308 For comparison with empirical results, we also performed meta-analysis of *in vitro* recordings from  
309 the cat stomach reported by Xue S *et al.*, [45] and generated the *Relative Lag* and spatiotemporal  
310 map of *SM Cell Periods*. These are illustrated as insets in **Fig 3D** and **3E** and corroborate our  
311 model findings. Thus, we demonstrate that our GMN model is a biologically plausible  
312 comprehensive network capable of generating an entrained slow-wave in the stomach with the  
313 appropriate rostrocaudal phase lags to support normal peristalsis.

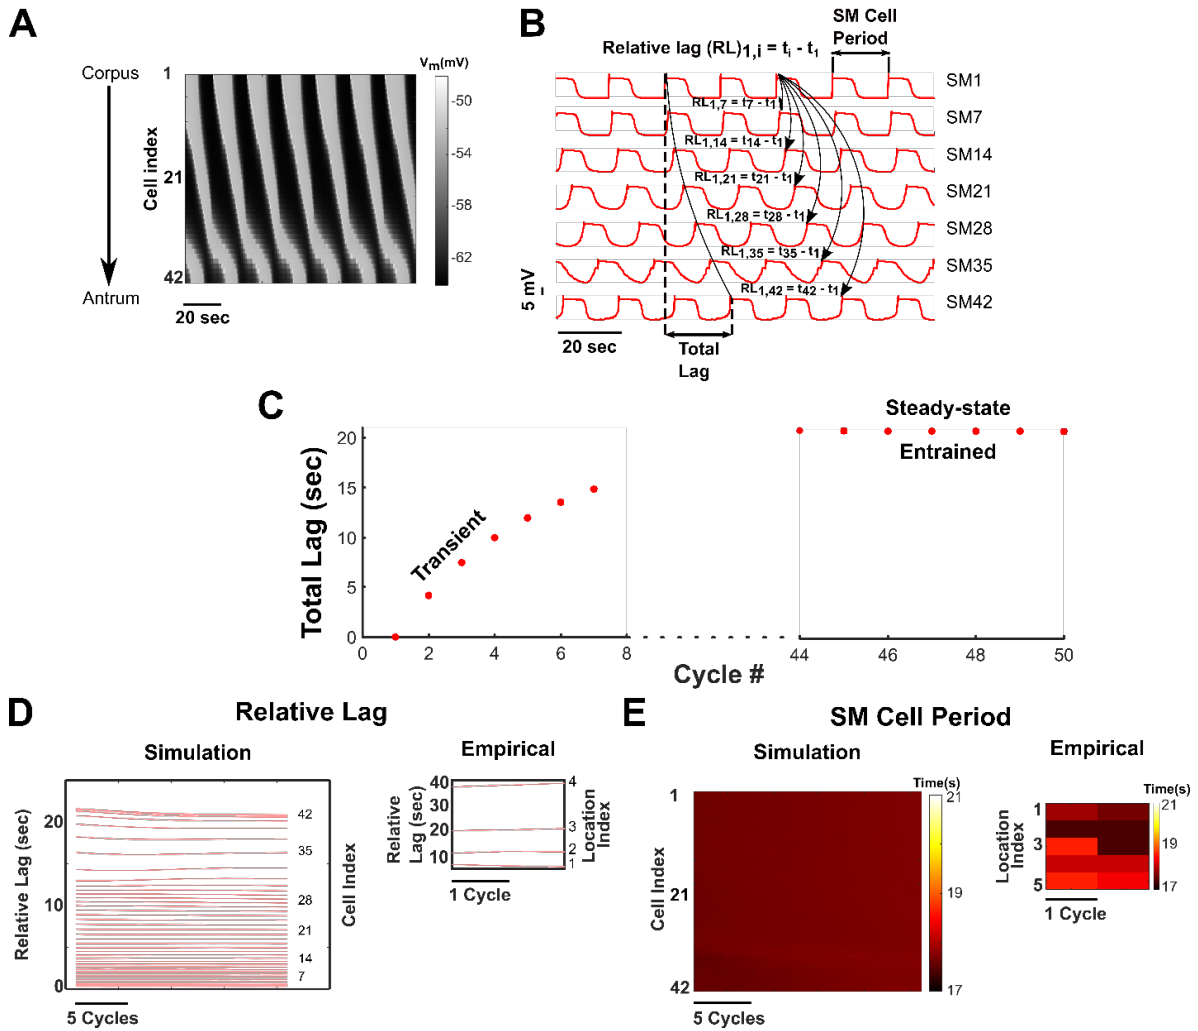

314

315 **Fig 3. Slow-wave propagation and entrainment in the GMN.** (A) Spatiotemporal plot of the SM cell  
 316 membrane potential along the length of the stomach (vertical axis) and time (horizontal axis) of all 42 SM  
 317 cells of the network. The direction of slow-wave propagation occurs from the rostral end of the network  
 318 (representing the mid-corpus) to the caudal end (representing the terminal antrum). (B) The membrane  
 319 potential of 7 equidistant SM cells in the 42-cell network. (C) *Total Lag* for the first 7 cycles of simulation  
 320 and the last 7 cycles of simulation (at steady state). (D) *Relative Lag* (RL) between the 1<sup>st</sup> SM cell and *i*<sup>th</sup>  
 321 SM cell in the network for the last 20 cycles, where  $i = 2, 3, 4, \dots, 42$ . The lag increases from the rostral end  
 322 of the network to the caudal end, indicating a decrease in slow-wave velocity. (E) Spatiotemporal map of  
 323 periods of all 42 SM cells in the network for the last 20 cycles. The inset plots for the *Relative Lag* (Fig 3D)  
 324 and *SM Cell Period* (Fig 3E) were generated from the *in vitro* recordings of SM activity at different locations  
 325 along the length of the cat stomach [45], where location 1 is the rostral-most recording.



326 **Inter-ICC electrical coupling and second messenger exchange synergize to generate**  
327 **slow-wave propagation**

328 Our *in silico* model with distinct electrical gap junction conductance and IP<sub>3</sub> and Ca<sup>2+</sup>  
329 permeabilities enabled us to study their specific contributions to network entrainment and GSW  
330 properties as shown in **Fig 4**. We examined the behavior of the *in silico* GMN model with coupling  
331 between ICCs through electrical gap junctions alone (**Fig 4A1**), with coupling through second  
332 messenger exchange of Ca<sup>2+</sup> and IP<sub>3</sub> (**Fig 4A2**) alone, or with both (**Fig 4A3**) over 900 seconds  
333 (as for the default network in **Fig 3**). When either electrical gap junction coupling or Ca<sup>2+</sup> and IP<sub>3</sub>  
334 permeabilities alone were present, we observed partial entrainment along the rostrocaudal chain  
335 as demonstrated by the *Relative Lags* (**Fig 4B1** and **4B2**) and the *SM Cell Periods* (**Fig 4C1** and  
336 **4C2**) and the results with electrical gap junction coupling alone (**Fig 4B1** and **4C1**) were akin to  
337 those observed in motility disorders where slow waves are decoupled and bradygastria is  
338 observed in the antrum while the corpus continues to demonstrate normal electrical activity [56].  
339 However, when both constitutive mechanisms were activated simultaneously, an enhanced  
340 *entrainment range* (**Fig 4A3, 4B3** and **4C3**) was obtained suggesting that addition of exchange  
341 of second messengers to electrical coupling has a synergistic effect.

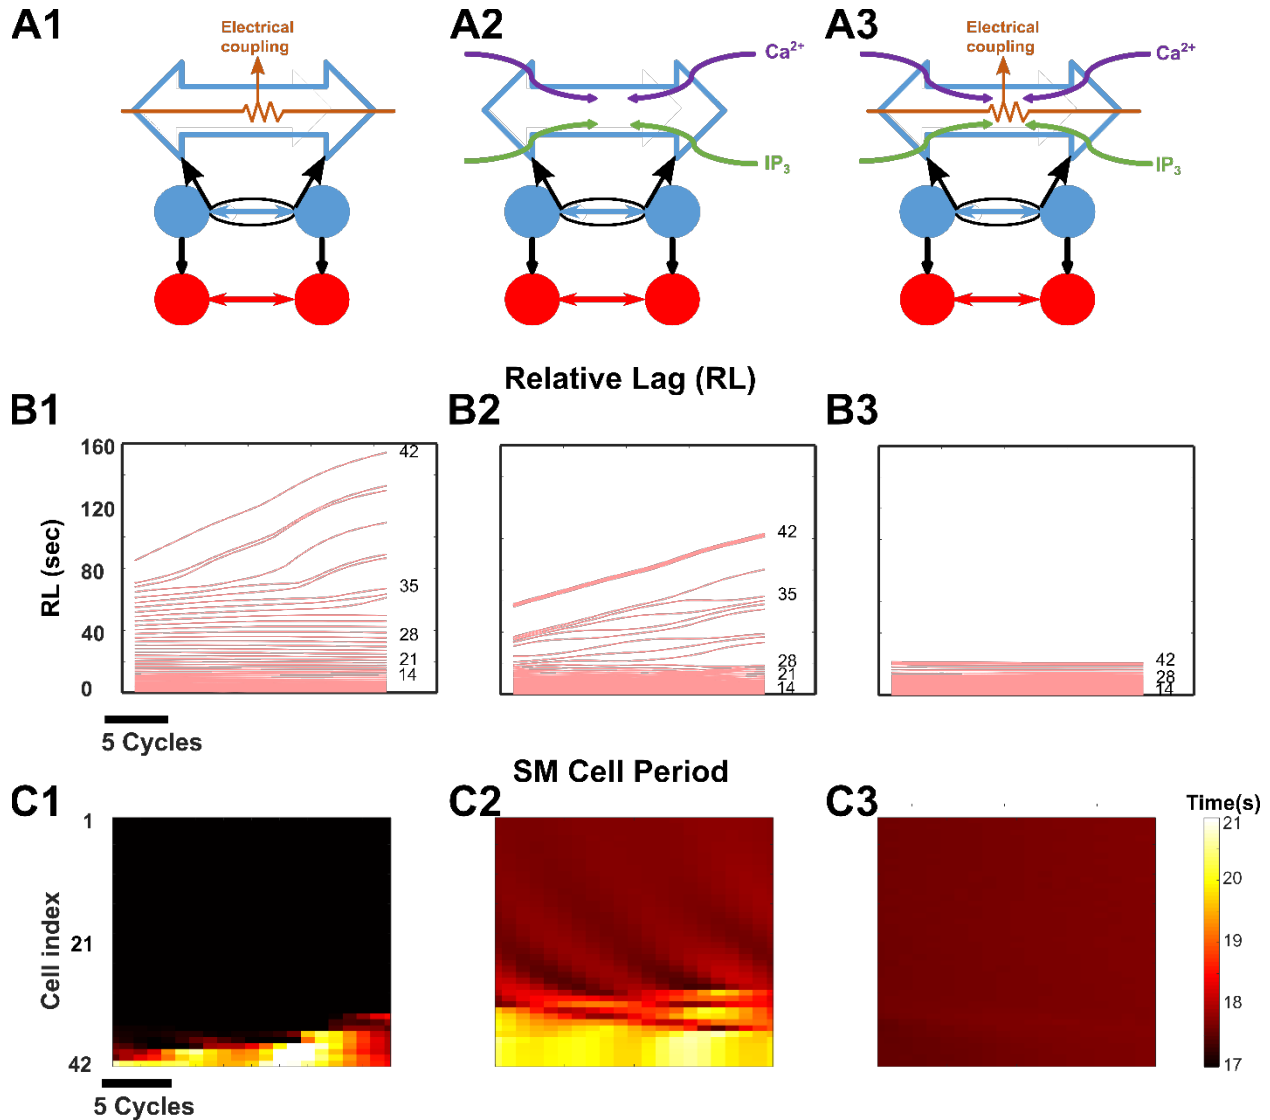

342

343 **Fig 4. Enhanced longitudinal entrainment. Synergy of electrical coupling and second messenger**  
 344 **exchange preserve longitudinal entrainment along the entire length of the stomach. (A1, A2 and A3)**  
 345 Structure of the network, when only electrical coupling is present (**A1**), when only exchange of second  
 346 messengers is present (**A2**), and when both electrical coupling and exchange of second messengers are  
 347 present (**A3**). (**B**) The *Relative Lags* for the three different cases shown in **Fig 4A** are measured from the  
 348 last 20 cycles of respective simulations. (**C**) Spatiotemporal maps of *SM Cell Periods* in the three different  
 349 cases respectively.

350 **Impact of increasing strengths of electrical gap junction coupling and exchange of**  
351 **second messengers between ICCs**

352 We performed a sensitivity analysis to characterize the effects of increasing strengths of electrical  
353 conductivity versus second-messenger permeabilities in inter-ICC coupling on network  
354 entrainment and found that they influence the entrainment range, the gastric slow-wave velocity,  
355 and the pacemaking frequency. **Fig 5A-5C illustrate** the network's behavior for increasing inter-  
356 ICC electrical coupling conductance,  $G_{ICC-ICC}$  two times above and below a default value of 0.7  
357 nS. The spatiotemporal maps of SM cell membrane potential and the corresponding *Relative Lag*  
358 and action potential periods of SM cells are respectively shown for the lowest (**Fig 5B1-5B3, left**)  
359 and highest (**Fig 5B1-5B3, right**)  $G_{ICC-ICC}$  values considered. In this range of coupling  
360 conductance strengths, the network transitioned from partial entrainment (**Fig 5B1-5B3, left**) to  
361 complete rostrocaudal entrainment (**Fig 5B1-5B3, right**). For the lowest  $G_{ICC-ICC}$  value  
362 considered, the *Relative Lag* diagram illustrated in **Fig 5B2, left** shows decoupled slow waves,  
363 whereas the *SM Cell Period* diagram depicted in **Fig 5B3, left** demonstrates signs of bradygastria.  
364 Steady-state rostrocaudal entrainment was achieved only for higher values of the  $G_{ICC-ICC}$  as  
365 shown by the levelling out of *Total Lag* in the color-coded insets in **Fig 5C**. Overall, an increase  
366 in the strength of electrical coupling conductance produced an enhancement in the *entrainment*  
367 *range*.

368 **Fig 5E-5G** present the network outcome for increasing  $IP_3$  permeability (values of  $P_{IP_3}$  two times  
369 above and below a default value of 8.0 sec<sup>-1</sup>) at the default value for the electrical coupling  
370 conductance. The spatiotemporal maps of SM cell membrane potential and the corresponding  
371 *Relative Lag* and action potential periods of SM cells are shown for the lowest (**Fig 5F1-5F3, left**)  
372 and highest (**Fig 5F1-5F3, right**)  $P_{IP_3}$  values considered. Similar to increasing  $G_{ICC-ICC}$  values,  
373 the networks with increasing  $P_{IP_3}$  values demonstrated a transition from partial entrainment to  
374 complete rostrocaudal entrainment. For the lowest  $P_{IP_3}$  value considered, the network generates

375 decoupled slow waves as shown in the *Relative Lag* diagram of **Fig 5F2, left**; however, unlike  
376 lowest  $G_{ICC-ICC}$  value, the network having lowest  $P_{IP_3}$  value considered demonstrates signs of  
377 tachygastria as illustrated by the *SM Cell Period* diagram in **Fig 5F3, left**. The tachygastria can  
378 be prevented by increasing exchange of  $IP_3$  across ICCs (**Fig 5F3, right**) [57].

379 For increasing  $G_{ICC-ICC}$  and  $P_{IP_3}$ , in both cases, the effect on *Total Lag* was qualitatively similar,  
380 i.e., decreased with increasing coupling strengths and reached an asymptote as shown in **Fig**  
381 **5D1 and 5H1** (actual values are provided in **S2, S4 Tables** respectively). These results suggest  
382 that increasing inter-ICC coupling strengths leads to robust rostrocaudal network entrainment  
383 wherein the gastric slow-wave velocity approaches a limit.

384 However,  $G_{ICC-ICC}$  and  $P_{IP_3}$  increases differentially altered the *SM Cell Periods* in the entrained  
385 networks at steady-state. This is shown in **Fig 5D2** and **Fig 5H2** respectively (actual values in **S3**  
386 and **S5 Tables**). The *SM Cell Period* decreased with increasing  $G_{ICC-ICC}$ , whereas increasing  
387 values of  $P_{IP_3}$  increased the *SM Cell Period*. These results suggest that with an increase in  $P_{IP_3}$ ,  
388 a decrease in the pacemaking frequency occurs whereas the gastric slow-wave velocity  
389 increases. Collectively, the results suggest that on an increase of electrical coupling strength and  
390  $IP_3$  permeability, the velocity of gastric slow-wave propagation increased while the pacemaker  
391 potential frequency increased with the former and decreased with the latter.

392 We also exclusively increased the  $Ca^{2+}$  permeability ( $P_{Ca^{2+}}$ ) to test its effects on network  
393 entrainment. We noted that even two orders of magnitude changes above and below the default  
394 value of  $P_{Ca^{2+}}$  produced negligible effect on all the network characteristics analyzed: *entrainment*  
395 *range*, *Relative Lag*, *SM Cell Periods* and *Total Lag* in the entrained networks (see **S6 Fig**). This  
396 is likely due to an order of magnitude lower permeability of  $Ca^{2+}$  compared to  $IP_3$  for gap junctions  
397 [18]. Due to this lack of effect of  $P_{Ca^{2+}}$  on entrainment and gastric slow-wave characteristics, in  
398 what follows, we will only focus on changing  $P_{IP_3}$ .

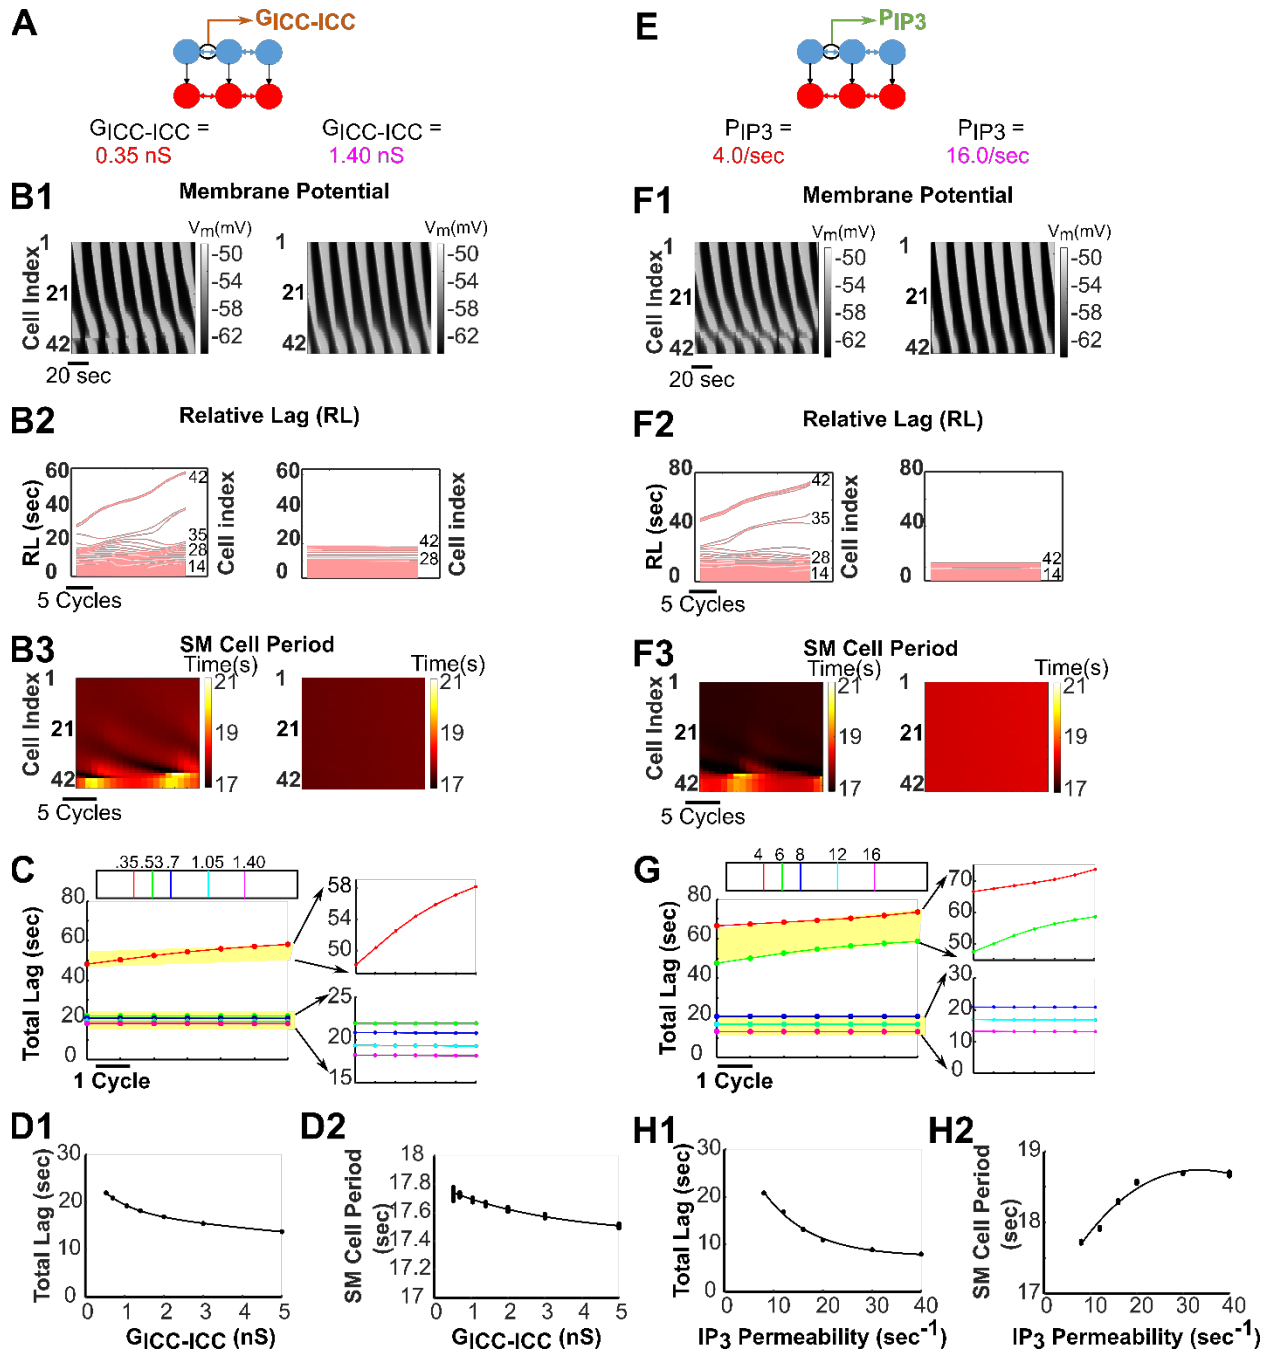

399

400 **Fig 5. Electrical gap junction and second messenger coupling strengths. The inter-ICC coupling**  
401 **strengths impact GMN entrainment, gastric slow-wave velocity and pacemaker frequency. (A, E)**  
402  $G_{ICC-ICC}$  and  $P_{IP_3}$  are altered for the simulations in **Fig 5B-5D** and **Fig 5F-5H**, respectively. **(B)**  
403 Spatiotemporal map of membrane potential **(B1)**, *Relative Lags* **(B2)**, and spatiotemporal map of *SM Cell*  
404 *Periods* **(B3)** for the network when  $G_{ICC-ICC} = 0.35$  nS (left panels, partially entrained) and 1.4 nS (right  
405 panels, entrained). **(C)** The *Total Lag* for changes in  $G_{ICC-ICC}$  is shown for the last 7 cycles of 900-sec  
406 simulations for different conductance values (nS) indicated by the color legend. The two distinct classes of  
407 responses are enlarged in the right panels (lower ones entrained, upper ones partially entrained). An  
408 increase in *Total Lag* indicates decrease in slow-wave velocity. **(F)** Spatiotemporal maps of membrane  
409 potential **(F1)**, *Relative Lags* **(F2)**, and spatiotemporal maps of *SM Cell Periods* **(F3)** for the network when  
410  $P_{IP_3} = 4.0$  sec<sup>-1</sup> (left panels, partially entrained) and 16.0 sec<sup>-1</sup> (right panels, entrained). **(G)** The *Total Lag*  
411 for changes in  $P_{IP_3}$  is shown for the last 7 cycles of 900-sec simulations for different conductance values  
412 (nS) indicated by the color legend. **(D, H)** For several networks, the mean *Total Lag* (odd numbered panels)  
413 and the *SM Cell Period* (even numbered panels) of the last 7 cycles for each network with respect to its  
414  $G_{ICC-ICC}$  and  $P_{IP_3}$  can be fit by individual exponential function, respectively. For increasing values of  $G_{ICC-ICC}$ ,  
415 an exponential fit ( $y = a_1 e^{-x/\beta_1} + a_2 e^{-x/\beta_2}$ , where  $a_1 = 8.65$ ,  $\beta_1 = 0.75$ ,  $a_2 = 18.23$ ,  $\beta_2 = 17.87$ ) has been  
416 drawn along the mean value of *Total Lag* and for increasing values of  $P_{IP_3}$ , another exponential fit ( $y =$   
417  $a_1 e^{-x/\beta_1} + a_2 e^{-x/\beta_2}$ , where  $a_1 = 7.44$ ,  $\beta_1 = 1.70e5$ ,  $a_2 = 32.07$ ,  $\beta_2 = 9.37$ ) has been drawn along the mean  
418 values of *Total Lag*. Partially entrained networks have not been considered for equation fitting. For *SM Cell*  
419 *Period* calculation, the last cell (42<sup>nd</sup> cell) has been considered as the representative cell of the network.  
420 An increase in *Total Lag* indicates decrease in slow-wave velocity while a decrease in *SM Cell Period*  
421 indicates increase in pacemaking frequency.

## 422 **Inter-ICC IP<sub>3</sub> exchange preserves longitudinal entrainment**

423 Variability in ICC coupling strengths could stem from variable gap junction densities in the  
424 stomach [58,59]. We find that inter-ICC IP<sub>3</sub> ensures appropriate slow-wave propagation and  
425 stable pacemaking potential generation under variable ICC coupling strengths. We first introduced  
426 variability in coupling conductance by random sampling of  $G_{ICC-ICC}$  values from a uniform

427 distribution (see corresponding results in **Fig 6A-6F**) in the absence of inter-ICC IP<sub>3</sub> exchange.  
428 The range of conductance values were *default* ± 20% or ± 50% or ± 100% (see **Fig 6A**). As  
429 shown in **Fig 6B**, the *Total Lags* have not reached a steady-state value in any of the three  
430 networks. Consequently, slow-wave velocity cannot be inferred from here and the failure of *Total*  
431 *Lag* to attain a constant value indicates absence of rostrocaudal network entrainment. **Fig 6C**  
432 shows the distribution of *Total Lags* computed over the last 7 cycles of simulation, using violin  
433 plots. From these plots we note that the variability in *Total Lags* consistently increases with the  
434 variability in coupling conductance strength. The SM cell membrane potential (**Fig 6D**), *Relative*  
435 *Lag*, (**Fig 6E**) and *Period* (**Fig 6F**) indicate that variability of  $G_{ICC-ICC}$  indeed gave rise to clusters  
436 of partial entrainment. The *Relative Lag* diagrams in **Fig 6E**, in particular, provide evidence for  
437 the decoupled slow waves. The *SM Cell Period* diagrams in **Fig 6F1 and 6F2** bears close  
438 resemblance to bradygastria whereas **Fig 6F3** demonstrates a mix of bradygastria and  
439 tachygastria. These results suggest that, in the absence of inter-ICC IP<sub>3</sub> exchange, decoupled  
440 slow waves and bradygastria and/or tachygastria can coexist.

441 Next, we included the inter-ICC IP<sub>3</sub> exchange along with electrical coupling and varied both the  
442  $G_{ICC-ICC}$  and  $P_{IP_3}$  values 20%, 50%, and 100% about their corresponding default values of 0.7 nS  
443 and 8.0 sec<sup>-1</sup>, respectively (**Fig 6G**). Interestingly, addition of IP<sub>3</sub> exchange enabled rostrocaudal  
444 entrainment for networks with 20% and 50% variability in these coupling parameters, but not with  
445 100% variability (see panels in **Fig 6H**). The distribution of *Total Lags* in **Fig 6I**, the SM cell  
446 membrane potential (**Fig 6J**), *Relative Lag* (**Fig 6K**), and *Period* (**Fig 6L**) further confirms these  
447 results. The *Relative Lag* diagrams in **Fig 6K1 and 6K2** show absence of decoupling for 20% and  
448 50% variability, respectively; in contrast, for 100% variability, **Fig 6K3** shows decoupled slow  
449 waves as evidenced by temporal changes in *Relative Lag*. Parallel observations have been made  
450 from the *SM Cell Period* diagrams in **Fig 6L1 and 6L2**, where signs of abnormal rhythmicity  
451 (bradygastria or tachygastria) are effectively eliminated, although for 100% variability, there are

452 still signs of bradygastria (**Fig 6L3**). Furthermore, **Fig 6H** demonstrates that there is no substantial  
 453 difference in the latency to reach entrainment between the networks having 20% and 50%  
 454 variability. Together these results suggest that the existence of intercellular exchange of IP<sub>3</sub> can  
 455 preserve the longitudinal entrainment to a greater extent along the length of the stomach, thereby  
 456 preventing decoupling and restoring the normal behavior.

457

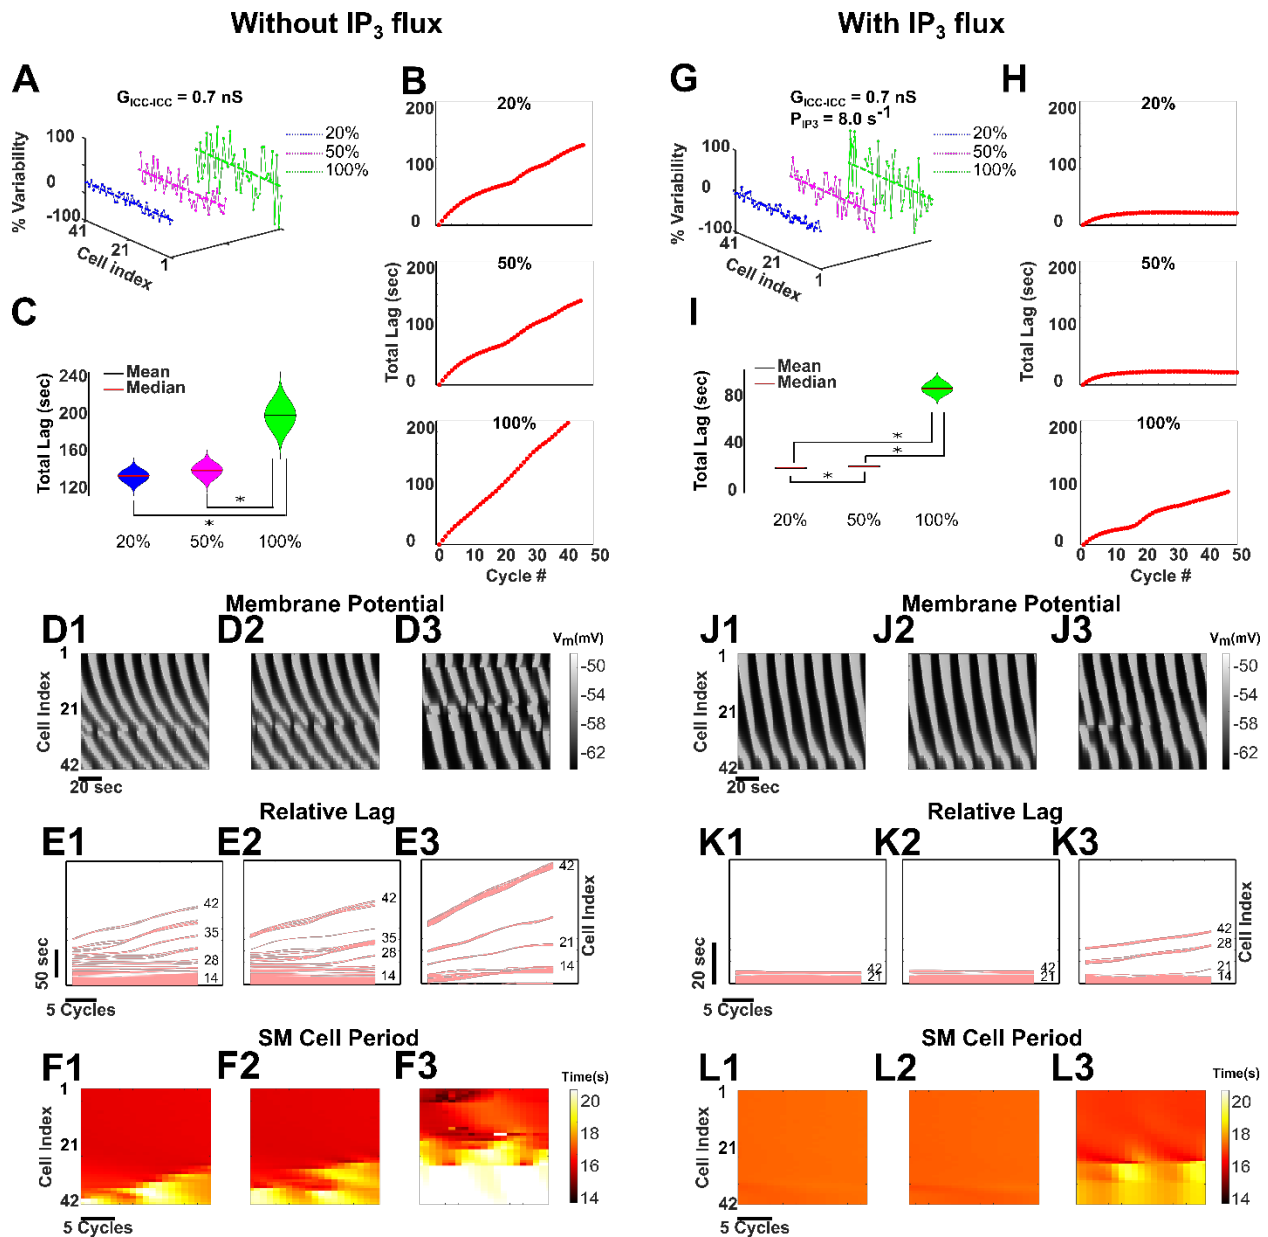

458



459 **Fig 6. Entrainment in GMN is resilient to variability in inter-ICC coupling strengths. (A,G)** The  
460 variability in only  $G_{ICC-ICC}$  **(A)** and both  $G_{ICC-ICC}$  and  $P_{IP_3}$  **(G)** (20%, 50%, and 100% variability) are shown  
461 around their mean values. **(B, H)** *Total Lag* of the network without inter-ICC  $IP_3$  exchange for three different  
462 variabilities in  $G_{ICC-ICC}$  **(B)** and of the network with inter-ICC  $IP_3$  exchange for three different variabilities in  
463  $G_{ICC-ICC}$  and  $P_{IP_3}$  **(H)**. The latency to entrainment cannot be inferred from any of the panels in **(B)**, since  
464 the *Total Lag* has not reached steady-state value in any of them. However, the latency to entrainment can  
465 be measured from the first two panels in **(H)**, since the *Total Lag* has attained constant value in these two  
466 cases. **(C, I)** *Total Lag* is shown for each case for the last 7 cycles in steady-state. A violin plot shows the  
467 differences in *Total Lag* for all three cases. The asterisk (\*) symbol represents a statistically significant  
468 difference between the corresponding quantities. Spatiotemporal diagrams of membrane potential **(D, J)**,  
469 *Relative Lags*, **(E, K)** and spatiotemporal maps of *SM Cell Periods* **(F, L)** for the network are shown for  
470 three different variabilities in  $G_{ICC-ICC}$  for the network without inter-ICC  $IP_3$  exchange and in  $G_{ICC-ICC}$  and  
471  $P_{IP_3}$  for the network without inter-ICC  $IP_3$  exchange, respectively.

472

## 473 **Discussion**

474 We have developed a computational framework consisting of a novel non-linear mathematical  
475 model for slow-wave propagation in the stomach wall that includes physiologically established  
476 intra- and intercellular mechanisms. Utilizing this framework, we have assessed the contribution  
477 of intercellular electrical coupling and intercellular exchange of second messengers on  
478 longitudinal entrainment of the gastric slow-wave. The intracellular concentrations of  $Ca^{2+}$  and  $IP_3$   
479 are modulated by intercellular exchange of respective molecules (see **Equations 2 and 4**). We  
480 found that our model with dynamically coupled nonlinear oscillators fed with second messengers  
481 from intercellular exchange and enteric neural stimuli, can regulate the frequency of contractions  
482 and velocity of the slow-wave, and can enhance the range of longitudinal entrainment of the  
483 gastric slow-wave. The combination of electrical coupling and exchange of second messengers  
484 provides robustness to the *entrainment range* in the presence of biological variability. In summary,

485 our detailed analyses of the ICC coupling mechanisms reveal ways in which the constitutive gap  
486 junction coupling mechanisms can enhance the network range and stability of the gastric slow-  
487 wave essential for peristaltic movement of food and fluid. Furthermore, this model can be used to  
488 examine novel hypotheses concerning aberrant mechanisms that may underlie different motility  
489 disorders.

#### 490 **Development of Gastric Motility Network (GMN) model**

491 In the present study, we developed a computational model consisting of a longitudinal  
492 arrangement of biophysically based ICC and SM cells found in the stomach wall. Since ICCs and  
493 their network are regarded as the key players for generation of pacemaker potentials and  
494 propagation of slow waves, we investigated whether and how the intrinsic properties of ICCs that  
495 are also modulated by enteric neural inputs enable inter-ICC coordination essential for  
496 entrainment. We also examined the crucial intercellular pathways that influence the *entrainment*  
497 *range*, important for long distance GSW propagation necessary for normal peristalsis. For this,  
498 we considered multiple interacting feedback pathways involving the intracellular key variables  
499 such as membrane potential,  $Ca^{2+}$  and  $IP_3$  concentration of an ICC as well as intercellular  
500 electrical coupling and exchange of second messengers. Further based on corroborative  
501 evidence that enteric neuron inputs to ICCs show a rostrocaudal gradient [52,53], and indirect  
502 evidence that indicates that neurotransmitters enhance  $IP_3$  in a variety of pacemaker cells [27–  
503 29], we assumed a gradient in the enteric neural stimulus along the ICC chain. Such a gradient  
504 was essential for the rostrocaudal entrainment of the slow-wave as also demonstrated in previous  
505 computational models [7,19].

#### 506 **Control of slow-wave characteristics by inter-ICC $IP_3$ exchange**

507 First, our simulation results for single ICC and SM cells agree qualitatively and semi-quantitatively  
508 with the experimentally measured results (**Fig 1**), thus validating the GMN model components.  
509 Next, our results show that the GMN with its multi-stage feedback between  $IP_3$ - $Ca^{2+}$ - $V_m$  combined

510 with the intercellular pathways (**Fig 2**) can generate slow-wave propagation with a uniform  
511 frequency and a uniform rostrocaudal lag, i.e., entrainment (**Fig 3**). Particularly, the presence of  
512 inter-ICC IP<sub>3</sub> exchange in addition to the gap junction electrical conductance can increase the  
513 range of longitudinal entrainment (**Fig 4**), while simultaneously minimizing the signs of  
514 bradygastric decoupled slow waves. Our observations are in accordance with the suggestion that  
515 bradygastria can potentially result from a failure of normal entrainment [60]. While the distinct  
516 intercellular mechanisms modeled in our network (exchange of second messengers and electrical  
517 coupling) are experimentally inseparable, the biophysical formulation included in the GMN model  
518 allowed examination of their individual contributions to longitudinal entrainment of ICCs. Second,  
519 we systematically evaluated the network behavior for increasing values of electrical conductance  
520 and IP<sub>3</sub> permeability (since Ca<sup>2+</sup> permeability was shown to have little to no impact on GSW  
521 entrainment). Surprisingly, the IP<sub>3</sub> exchange affected the features of the slow-wave in a manner  
522 that can stabilize the propagating wave (from tachygastric decoupled slow waves for low IP<sub>3</sub> to a  
523 normal coupled gastric slow-wave for elevated IP<sub>3</sub>). In particular, increased IP<sub>3</sub> permeability of  
524 gap junctions resulted in an *increase* in the *SM Cell Period* (bordering the signs of bradygastria)  
525 whereas increased gap junction electrical conductance caused a *decrease* in the *SM Cell Period*  
526 (bordering the signs of tachygastric). Thus, in combination with the contrasting effects of electrical  
527 conductivity, the IP<sub>3</sub> coupling could flexibly modulate the SM cell frequencies. We suggest that  
528 the apparent compensatory effect of IP<sub>3</sub> permeability could act as a brake on preventing runaway  
529 tachygastric (elevated SM cell frequencies, which is inversely related to *SM Cell Period* or  
530 pacemaking potential duration) in the event of increasing electrical coupling strengths. Increased  
531 gap junction density, which is reflected by increased gap junction coupling strength in our model,  
532 has been demonstrated in colonocytes during bacterial infections resulting in diarrhea generation  
533 [61]. Whether the same holds true for gastric motility disorders requires further experimental  
534 investigation. Even if the electrical gap junction density becomes exceedingly high, the inter-ICC

535 IP<sub>3</sub> coupling makes sure that the SM cell frequency, and therefore, gastric contraction frequency  
536 stays in a physiologically plausible range.

537 Interestingly, increasing values of electrical conductance or IP<sub>3</sub> permeability led to an increased  
538 slow-wave velocity. In our results, the increase of slow-wave velocity was demonstrated by a  
539 decrease in the *Total Lag* of the slow-wave (**Fig 5**). These observations are very similar to the  
540 observations in studies of the dog small intestine where a negative gradient of gap junctions exists  
541 across the duodenum, jejunum and ileum and so does the slow-wave velocity in these  
542 compartments of the small intestine [62]. Electrophysiological experiments with gap junction  
543 enhancers (such as in Rotigaptide [63]) also support the observations of our computational study.  
544 As per our knowledge, such gap junction enhancers have not been employed as medicinal  
545 interventions yet, although they have the potential to elevate the reduced slow-wave velocity as  
546 observed in gastroparesis patients [60]. We would have to be very cautious though in introducing  
547 such enhancers, since slow-wave velocity has been reported to be already highly elevated in the  
548 gastric corpus of aged patients having gastroparesis with impaired peristalsis [64] and somewhat  
549 elevated in glucagon induced hyperglycemic dogs [6]. Future experiments could investigate the  
550 proper dosage of the gap junction enhancers so that the slow-wave velocity remains in a moderate  
551 range. For now, we can only speculate that in an intact stomach, the electrical gap junction  
552 coupling strength probably does not reach an exceedingly high value, and even if it has a  
553 moderately high value, **Fig 5D1 and 5H1** show that the slow-wave velocity reaches a limit, which  
554 is within a physiologically reasonable range.

#### 555 **Distinct period-velocity relationships exist for increasing $G_{ICC-ICC}$ and $P_{IP3}$**

556 According to coupled oscillator theory, the direction of the slow-wave would depend on the  
557 frequency gradient of component pacemaker ICCs, whereas the slow-wave velocity would  
558 depend on the intercellular coupling strength [65]. Therefore, ideally, there should be a dispersion  
559 relationship between slow-wave velocity and frequency (expressed by *SM Cell Period*, in our

560 case). However, previous studies of the canine gastric antrum [65] and porcine gastric corpus  
561 and antrum [66] suggest a dependence of slow-wave velocity on the observed *SM Cell Period*.  
562 The period-velocity relationship as noted in **Fig 5H1 and 5H2** (higher the period, higher the  
563 velocity) for increasing permeability of  $IP_3$  supports these *in vitro* [65] and *in vivo* [66] findings. In  
564 contrast, the period-velocity relationship noted in **Fig 5D1 and 5D2** (lower the period, higher the  
565 velocity) for increasing electrical coupling strength is somewhat surprising. Because, if the period  
566 decreases, the velocity of a slow-wave should drop as a response to encroachment on the tail of  
567 the previous slow-wave (see **Fig 7 in [66]** for a more intuitive understanding). Although such a  
568 relationship has been observed along the length of the intestine [62] under normal conditions, its  
569 occurrence is probably due to the emergence of frequency plateaus, which in fact reflect localized  
570 decoupling due to the reduced gap junction density at certain points along the intestinal length  
571 [59]. Frequency plateaus are not observed in the stomach under normal conditions.  
572 Consequently, localized decoupling due to the reduced gap junction density along the length of  
573 the stomach is an unlikely explanation for the observed period-velocity relations in **Fig 5D1 and**  
574 **5D2**. We believe that the less pronounced effect of increasing  $G_{ICC-ICC}$  on velocity (reflected as  
575 *Total Lag* in **Fig 5D1**) and period (illustrated in **Fig 5D2**) compared to the effect of increasing  $P_{IP_3}$   
576 on the same quantities (**Fig 5H1 and 5H2**) makes sure that the trajectory of a slow-wave having  
577 increased  $G_{ICC-ICC}$  does not appear synchronously with the tail of the previous slow-wave, thus  
578 avoiding the positive correlation between period and velocity. In our model results, we are  
579 concerned only with the velocity from the rostral end to the caudal end. Measurement of velocity  
580 gradient (if there is any) and a non-uniform modeling of gap junction conductance [15] along with  
581 the measurement of gap junction density in various animal models could shed further light on the  
582 model predictions.

583 **Exchange of second messengers ensures robust rostrocaudal entrainment when**  
584 **biological variability is present**

585 Finally, we showed that while variability in electrical coupling results in loss of rostrocaudal  
586 entrainment (signs of bradygastria and mix of bradygastria and tachygastria observed), presence  
587 of IP<sub>3</sub> exchange despite variability in its permeability, can restore rostrocaudal entrainment (**Fig**  
588 **6**) and therefore, is essential for peristalsis. Here, inter-ICC IP<sub>3</sub> exchange offers resilience to the  
589 increased variability in coupling strength. This is noteworthy because gap junctions in ICC  
590 networks can have variable density in different compartments of the stomach [15,16] and the  
591 observed consequences of increasing the variability in inter-ICC coupling in our simulations  
592 highlight that this might be a feature important for regulating the wave velocity while maintaining  
593 the range of entrainment. Our model with the distinct intercellular mechanisms (exchange of  
594 second messengers and electrical coupling) in combination with the intracellular feedback  
595 pathways and rostrocaudal neural stimulus gradient allows SM cells to oscillate with a moderate  
596 range of frequencies and the gastric slow-wave to propagate with a broad range of velocities (**Fig**  
597 **5**). Thus, the GMN confers high robustness to the rostrocaudal entrainment of ICCs, including  
598 under instances of biological variability in coupling pathways (**Fig 6**). Robustness is a fundamental  
599 property of evolvable complex biological systems [67]; a simple mechanism cannot handle  
600 extreme changes in physical quantities. Our model offers a new integrative framework for  
601 conceptualizing GSW propagation and regulation as a robust system of dynamically coupled  
602 oscillators fed with second messengers through intercellular exchange.

603 **Biological and theoretical assumptions of the GMN model**

604 Although numerous biological mechanisms are involved in the orchestration of gastric motility  
605 [68], it is well-established that the peristaltic movement of food/liquid is mediated by a propagating  
606 wave of smooth muscle contractions along the stomach wall [5,13,14,69]. This so-called gastric  
607 slow-wave involves electrical activity transmitted aborally within the SM cells [55,70]. However,

608 the SM cells on their own cannot produce such a regenerative wave [70,71]. The regenerative  
609 electrical activity responsible for the GSW is known to originate largely in the intrinsic pacemaker  
610 ICCs [5,42]. Different sets of ICCs innervate circular and longitudinal muscle cells (e.g., myenteric  
611 ICCs, intramuscular ICCs [5,13]) and all ICCs may not contribute similarly to pacemaker potential  
612 generation and GSW propagation [68]. Our ICC cell model is derived primarily from experimental  
613 work on myenteric ICCs, which are widely accepted as intrinsic pacemakers involved in the  
614 generation of the pacemaker potential required for GSW propagation [5]. We incorporated known  
615 membrane properties in the ICCs and SM cell models using the conductance-based formalism  
616 and hand-tuned the conductance parameters to match experimental voltage recordings in these  
617 cells (**Fig 1C and 1D**) [45]. Although our model can reproduce rather accurately the established  
618 properties of a gastric slow-wave, it should be noted that the description of the underlying  
619 mechanisms is by no means exhaustive. For example, we have chosen to use a Hodgkin-Huxley  
620 formalism for the ion currents whereas Markovian models would allow for a more detailed  
621 description of the complex kinetics of processes (activation, deactivation, inactivation, and  
622 recovery from inactivation) that the channels exhibit. However, it can be very challenging to meet  
623 the information requirements for defining the transitional rate constants of a Markovian model, in  
624 addition to higher computational processing demands [72].

625 Although ICCs are intrinsic pacemakers, the GSW can significantly be impacted by the coupling  
626 between them [8,73,74]. Gap junctions are well-established pathways for such coupling [75]. The  
627 gap junctions carry various ions and molecules. Some of these (e.g.,  $K^+$ ) are passively conducted  
628 due to the voltage gradients between adjacent cells (the electrical component), while others  
629 spread when there are periodic depolarizations in ICCs that generate these molecules in  
630 abundance. The latter are typically second messengers such as  $IP_3$  and  $Ca^{2+}$ , which involve  
631 chemical coupling via connexin channels [22,23,25,35,36]. The diameter of gap junctional pores  
632 allows a wide enough path for  $Ca^{2+}$  and  $IP_3$  to move across the cells through gap junction

633 connexins [76]. To model electrical coupling, a simple ohmic conductance has been widely  
634 assumed by previous modeling studies [7,8,19,69,77,78], supported by findings that pacemaker  
635 current generated in ICCs is transmitted to the SM cells by gap junction channels located between  
636 the ICCs and SM cells [15,17]. We additionally assumed a distinct exchange of second  
637 messenger ( $\text{Ca}^{2+}$  and  $\text{IP}_3$ ) between adjacent ICCs. Second messenger exchanges are modeled  
638 in such a way that they enable  $\text{Ca}^{2+}$  induced  $\text{Ca}^{2+}$  release and  $\text{IP}_3$  induced  $\text{IP}_3$  release. Although  
639  $\text{Ca}^{2+}$  induced  $\text{Ca}^{2+}$  release is a widely assumed phenomenon within a biological cell,  $\text{IP}_3$  induced  
640  $\text{IP}_3$  release has also been suggested as a plausible event [79].  $\text{Ca}^{2+}$  permeability was set an order  
641 of magnitude lower than that of  $\text{IP}_3$  permeability. This assumption was based on the fact that the  
642 range of diffusion of  $\text{IP}_3$  is orders of magnitude higher compared to free  $\text{Ca}^{2+}$  (24  $\mu\text{m}$  compared  
643 to 0.1  $\mu\text{m}$ ).  $\text{IP}_3$  also degrades much more slowly than free  $\text{Ca}^{2+}$  (1 sec vs. 0.00003 sec) [80].  
644 Previous modeling studies of intercellular  $\text{Ca}^{2+}$  waves in astrocytes [35] and smooth muscle cells  
645 [24] support this approach of modeling  $\text{Ca}^{2+}$  and  $\text{IP}_3$  permeability. The exchange of  $\text{IP}_3$  was  
646 modeled as proportional to the  $\text{IP}_3$  concentration gradient between adjacent cells (see **Methods**,  
647 also [81]). Although  $\text{IP}_3$  can diffuse within the cell cytoplasm and not necessarily through the gap  
648 junctions, we assumed that  $\text{IP}_3$  only moves to the adjacent cells based on the concentration  
649 gradient. For **Fig 3-5**, we considered constant values of gap junction coupling parameters and for  
650 **Fig 6**, we assumed uniform distribution of gap junction coupling strength, which resembles the  
651 gap junction density. Because of the scarcity of data regarding gap junction distribution, we limited  
652 our simulations to only uniform distribution.

653 In a chain of intrinsic pacemakers, oscillators have their own distinct intrinsic frequency. In an  
654 arbitrarily long chain of oscillators, entrainment can emerge provided there exists a linear  
655 frequency gradient with fixed frequency difference between the ends [82]. Interestingly in the  
656 stomach (also throughout the GI tract), it is known that there is a rostrocaudal frequency gradient  
657 in the ICC pacemaker cells. Although such gradients may be achieved by numerous intrinsic and



658 network mechanisms [7,19], we assume that such a gradient in intrinsic frequencies can be  
659 achieved due to a maintained gradient in  $[IP_3]$  production rate. Presently it is unclear what sets  
660 this gradient tone in  $IP_3$  production rate. One possibility could be  $IP_3$  produced by activation of  
661 muscarinic receptors due to graded distribution of cholinergic neuron inputs in different functional  
662 compartments of the GI tract [52,53]. Although peristalsis can occur even without the help of  
663 neural excitation [68], under most circumstances, the enteric nervous system, provides excitation  
664 of the musculature required for the stomach wall contraction [26,83], primarily via ICCs. Enteric  
665 neurons located in the Myenteric Plexus preferentially directly influence ICCs through  
666 neurotransmitters released at synapses which then connect to muscle cells via gap junctions.  
667 Since ICCs are closer to the nerve terminal endings and have the muscarinic receptors (M2 and  
668 M3) that are responsive to the neurotransmitters, the effect of the Myenteric neurons on ICCs is  
669 more important (much smaller gap for neurotransmitters to diffuse) than the direct link to the SM  
670 cells (far away and with lesser innervation). Acetylcholine, the primary neurotransmitter released  
671 from enteric neurons, is broken down by Acetylcholine esterase, thus preventing it from reaching  
672 receptors on SM cells. Consequently, we considered the enteric neural stimulus ( $\beta$ ) to act  
673 exclusively on ICCs in our GMN model. The animal models that lack ICCs with muscarinic  
674 receptors show that there is little or no cholinergic response in SM cells because Acetylcholine is  
675 broken down before it can be taken up by receptors on SM cells [26]. In our model, we maintained  
676 a linear gradient of  $\beta$  to ensure that rostral ICCs successively entrained caudal ICCs. This way,  
677 we assembled a chain of realistic ICCs which show a rostrocaudal gradient in their intrinsic  
678 frequencies like that observed in the stomach. In the heart, fast-pacing sinoatrial node cells  
679 entrain the slow-pacing atrioventricular node cells [84], like what is observed in an intact stomach.  
680 Besides being intrinsic pacemakers, ICCs are also involved in neurotransmission, setting the  
681 membrane potential of SM cells, and in stretch sensing [51]. Future experiments examining  
682 effects of neural input on ICCs may shed further light on the neural contribution to pacemaker  
683 potential generation and slow-wave propagation. Empirical measurements of the neural stimulus

684 on ICCs at different points along the stomach would strengthen the validity of our model, offering  
685 further hypotheses for the mechanisms underlying genesis of functional and pathological slow  
686 waves in the stomach. The mathematical modeling framework outlined in our study is a step in  
687 this direction and provides an exploration testbed for precise modulation of intra/intercellular  
688 pathways to examine their role in the above-mentioned phenomena.

689

## 690 **Methods**

691 The model network of ICC-SM cells is described in **Fig 2**. The network consists of 42 ICCs and  
692 42 SM cells implemented and simulated in MATLAB 2019a (Mathworks.inc). Together, the  
693 extensive biological details of ICC and SM cell physiology and the assumed intercellular coupling  
694 resulted in a large network model with 1554 nonlinear differential equations (23 for each ICC and  
695 14 for each SM cell) consisting of over 1000 parameters. The parameter values were chosen from  
696 published models [7,42,43].

### 697 **ICC cell model**

698 We adopted a well-described conductance-based model by Corrias *et al.*, 2008 [42] for the ICCs  
699 (also see [7,19]). The rate of change in the membrane potential,  $V_{ICC}$ , for each ICC is as follows:

$$700 \quad C_{m,ICC} \frac{dV_{ICC}}{dt} = -(\sum I_{ion,ICC} + I_{g,ICC}), \quad (1)$$

701 where  $V_{ICC}$  is the ICC membrane potential,  $C_{m,ICC}$  is the ICC membrane capacitance,  $I_{ion,ICC}$   
702 represents the summation of all the ionic currents in ICC, and  $I_{g,ICC}$  represents the current through  
703 the gap junctions between the ICCs. The different ionic currents included in the model are  
704 described in **Table 1**. The dynamics of the voltage-dependent gating variables for the ionic  
705 currents follow the well-known Hodgkin-Huxley formalism, where each current is represented by  
706 a battery (electrochemical driving force) in series with a variable resistance and the cell membrane  
707 as a capacitor in parallel. The combined actions of these ion channel currents reproduce the three

708 phases of a gastric action potential: depolarization, plateau phase, and repolarization. Detailed  
 709 descriptions of these ionic currents are provided in the github repository  
 710 ([https://github.com/ashfaq-polit/Slow\\_waves\\_in\\_the\\_stomach](https://github.com/ashfaq-polit/Slow_waves_in_the_stomach)) and are based on previous  
 711 modeling studies [42,43,85].

712 **Table 1: Ionic currents in the ICC model**

| Symbol used  | Description                                                       | Symbol used | Description                                  |
|--------------|-------------------------------------------------------------------|-------------|----------------------------------------------|
| $I_{L-type}$ | L-type $Ca^{2+}$ current                                          | $I_{NSCC}$  | Non-selective cation current                 |
| $I_{VDDR}$   | Voltage-dependent and dihydropyridine-resistant $Ca^{2+}$ current | $I_{LVA}$   | Low voltage-activated $Ca^{2+}$ current      |
| $I_{Na}$     | Voltage-dependent $Na^+$ current                                  | $I_{Cl}$    | Voltage-dependent chloride current           |
| $I_{kv}$     | Kv1.1-type voltage-dependent $K^+$ current                        | $I_{kr}$    | Delayed rectifier $K^+$ current              |
| $I_{ERG}$    | Ether-a-go-go (ERG) $K^+$ channel current                         | $I_{ka}$    | A-type potassium current                     |
| $I_{kb}$     | Background $K^+$ current                                          | $I_{coup}$  | Gap junction current between ICC and SM cell |
| $I_{BK}$     | Large conductance Calcium-dependent $K^+$ current                 |             |                                              |

713

714  **$Ca^{2+}$ - $IP_3$  dynamics in ICCs**

715 The equation guiding the intracellular  $Ca^{2+}$  dynamics is modeled similar to Fall and Keizer [86]  
 716 as follows:

717 
$$\frac{d[Ca^{2+}]_i}{dt} = f_c \left( \frac{-I_{L-type} - I_{VDDR}}{FV_{cyto}} + J_{leak} - J_{PMCA} + J_{g,Ca^{2+}} \right), \quad (2)$$

718 Where  $I_{L-type}$  and  $I_{VDDR}$  are described in Table 1,  $J_{leak}$  is a leakage flux between the pacemaker  
 719 region and the cytosol,  $J_{PMCA}$  is the  $Ca^{2+}$  flux through the plasmalemmal  $Ca^{2+}$  pump,  $F$  is the  
 720 Faraday constant,  $f_c$  is a dimensionless constant,  $V_{cyto}$  represents the cytosolic volume fraction  
 721 within the ICC, and  $J_{g,Ca^{2+}}$  is the  $Ca^{2+}$  flux due to inter-ICC coupling (see **Equation 6**).

722 The  $\text{Ca}^{2+}$  flux in a sub-membrane space triggered by  $\text{IP}_3$ -operated stores in the endoplasmic  
 723 reticulum (ER) is important for initiating a gastric action potential. The  $\text{Ca}^{2+}$  concentration in the  
 724 sub-membrane space is modeled by the following equation:

$$725 \quad \frac{d[\text{Ca}^{2+}]_{PU}}{dt} = f_c \left( (J_{NaCa} - J_{Uni}) \frac{V_{mito}}{V_{SS}} + (J_{ERout} - J_{SERCA}) \frac{V_{ER}}{V_{SS}} - J_{leak} \frac{V_{cyto}}{V_{SS}} \right), \quad (3)$$

726 Where  $J_{NaCa}$  and  $J_{Uni}$  represent mitochondrial  $\text{Ca}^{2+}$  fluxes,  $J_{ERout}$  and  $J_{SERCA}$  represent outward  
 727  $\text{Ca}^{2+}$  fluxes from the ER and inward  $\text{Ca}^{2+}$  fluxes through the ER.  $V_{mito}$ ,  $V_{ER}$ , and  $V_{SS}$  represent the  
 728 volume fractions for the mitochondria, endoplasmic reticulum, and pacemaker submembrane  
 729 space, respectively.

730 Increases in intracellular  $\text{IP}_3$  concentration in each ICC are assumed to depend on: 1) voltage-  
 731 dependent  $\text{IP}_3$  increase, 2) inter-ICC coupling-dependent  $\text{IP}_3$  increase, and 3) neurotransmitter-  
 732 induced  $\text{IP}_3$  increase, whereas linear and non-linear degradation of  $\text{IP}_3$  decrease its concentration.  
 733 Based on these assumptions, the rate of change in  $\text{IP}_3$  concentration is given as follows:

$$734 \quad \frac{d[\text{IP}_3]}{dt} = P_{MV} \left( 1 - \frac{V_m^8}{k_v^8 + V_m^8} \right) - \eta [\text{IP}_3] - V_{m4} \frac{[\text{IP}_3]^4}{k_4^4 + [\text{IP}_3]^4} + \beta + J_{g,IP_3}, \quad (4)$$

735 where  $P_{MV}$  is maximal rate of voltage-dependent  $\text{IP}_3$  synthesis,  $K_V$  is the half-saturation constant  
 736 for voltage-dependent  $\text{IP}_3$  synthesis,  $\eta$  is the rate constant for linear  $\text{IP}_3$  degradation,  $V_{m4}$  is  
 737 maximal value for the nonlinear  $\text{IP}_3$  degradation,  $K_4$  is half-saturation constant for the nonlinear  
 738  $\text{IP}_3$  degradation,  $\beta$  represents an enteric neural stimulus that modulates  $\text{IP}_3$  production, and  $J_{g,IP_3}$   
 739 is the  $\text{IP}_3$  flux due to inter-ICC coupling (see **Equation 7**).

#### 740 **Intercellular coupling between ICCs**

741 Adjacent ICCs are assumed to be coupled via gap junctions with electrical conductance for  
 742 passive ionic movement between cells [17]. The inter-ICC gap junction current is:

$$743 \quad I_{g,ICC} = G \sum_j (V_i - V_j), \quad (5)$$

744 where  $i$  denotes the index for the source ICC and  $j$  denotes the index for adjacent ICCs;  $G$   
745 represents electrical conductance of gap junctions.

## 746 **Second messenger exchange between ICCs**

747 An exchange of second messengers, namely,  $\text{Ca}^{2+}$  and  $\text{IP}_3$  can occur via gap junctions [22–  
748 24,81]. The flux describing  $\text{Ca}^{2+}$  exchange between adjacent ICCs is modeled by a term

$$749 \quad J_{g,\text{Ca}^{2+}} = -P_{\text{Ca}^{2+}} \sum_j ([\text{Ca}^{2+}]_i - [\text{Ca}^{2+}]_j) \quad (6)$$

750 complementing Equation 2. Here  $P_{\text{Ca}^{2+}}$  denotes the permeability coefficient for  $\text{Ca}^{2+}$  and  $[\text{Ca}^{2+}]_x$   
751 are the intracellular concentrations of  $\text{Ca}^{2+}$  in the corresponding cells where  $x = i/j$ . The  $P_{\text{Ca}^{2+}}$   
752 value has been taken from a theoretical study done in hepatocytes [87].

753 The inter-ICC  $\text{IP}_3$  flux is modeled using a similar formalism:

$$754 \quad J_{g,\text{IP}_3} = -P_{\text{IP}_3} \sum_j ([\text{IP}_3]_i - [\text{IP}_3]_j) \quad (7)$$

755

756 Here  $P_{\text{IP}_3}$  denotes the permeability coefficient for  $\text{IP}_3$  and  $[\text{IP}_3]_x$  are the intracellular concentrations  
757 of  $\text{IP}_3$  in the corresponding cells where  $x = i/j$ . An experimentally determined value of  $P_{\text{IP}_3}$  is rare  
758 if not non-existent due to the technical difficulties of measuring  $[\text{IP}_3]$  in tissue preparations. Hence,  
759 the permeability values used in model simulations were adjusted similar to [24,35].

## 760 **SM cell model**

761 The SM cell model was adopted from Corrias *et al.*, 2007 [43]. Like ICCs, the conductance-based  
762 rate of change in membrane potential is given as follows:

$$763 \quad C_{m,\text{SM}} \frac{dV_{\text{SM}}}{dt} = -(\sum I_{\text{ion},\text{SM}} + I_{g,\text{SM}} - I_{\text{coup}}), \quad (8)$$

$$764 \quad I_{\text{coup}} = g_{\text{coup}} (V_{\text{ICC}} - V_{\text{SM}}), \quad (9)$$

765 Where  $V_{\text{SM}}$  is the SM cell membrane potential,  $C_{m,\text{SM}}$  is the SM cell membrane capacitance,  $I_{\text{ion},\text{SM}}$   
766 represents the summation of all the ionic currents in the SM cell,  $I_{g,\text{SM}}$  represents the current

767 through the gap junctions between the SM cells, and  $I_{coup}$  represents the coupling current from  
768 ICC to its corresponding SM cell. Although a bidirectional movement of ions can occur via gap  
769 junctions, here we assume that during entrainment depolarization spreads unidirectionally from  
770 ICC to SM and that  $V_{ICC}$  is always more positive than  $V_{SM}$  [70]; hence, the coupling current,  $I_{coup}$   
771 is present only in **Equation 8**. The various ionic currents necessary to generate the SM action  
772 potential are listed in **Table 1**.

### 773 **Model simulation and analysis**

774 The ICC-SM model network consisting of 42 ICCs and 42 SM cells was implemented and  
775 simulated in MATLAB 2019a (Mathworks.inc) using built-in function ODE15s and variable step-  
776 size. The total runtime for each simulation was 900 seconds (each simulation lasted  
777 approximately 8 hours on an Intel Xeon (R) CPU, 32 GB RAM Desktop computer). The outcome  
778 of the network was interpreted from the spatiotemporal membrane potential, *Relative Lag* and  
779 *period of SM cells* (explained in **Results** section). Statistical tests (t-test, one-way ANOVA) were  
780 performed as required and an  $\alpha$  cutoff of 0.05 was chosen for statistical significance.

781

### 782 **Author Contributions**

783 Conceptualization: RJ, MAA. Formal analysis: MAA. Investigation: MAA, SV, RJ. Project  
784 administration and Supervision: RJ. Visualization: MAA, SV. Writing of original draft: MAA,  
785 Review and Editing: MAA, SV, RJ.

786

### 787 **References**

- 788 1. Sanders KM, Koh SD, Ward SM. Interstitial cells of Cajal as pacemakers in the  
789 gastrointestinal tract. *Annu Rev Physiol.* 2006;68: 307–343.  
790 doi:10.1146/annurev.physiol.68.040504.094718
- 791 2. Coleski R, Hasler WL. Coupling and propagation of normal and dysrhythmic gastric slow

- 792 waves during acute hyperglycaemia in healthy humans. *Neurogastroenterol Motil.*  
793 2009;21. doi:10.1111/j.1365-2982.2008.01235.x
- 794 3. Lin X, Chen JDZ. Abnormal gastric slow waves in patients with functional dyspepsia  
795 assessed by multichannel electrogastrography. *Am J Physiol - Gastrointest Liver Physiol.*  
796 2001;280: 1370–1375. doi:10.1152/ajpgi.2001.280.6.g1370
- 797 4. Jebbink RJA, Samsom M, Bruijs PPM, Bravenboer B, Akkermans LMA, Vanberge-  
798 Henegouwen GP, et al. Hyperglycemia induces abnormalities of gastric myoelectrical  
799 activity in patients with type I diabetes mellitus. *Gastroenterology.* 1994;107: 1390–1397.  
800 doi:10.1016/0016-5085(94)90541-X
- 801 5. Hirst GDS, Edwards FR. Generation of slow waves in the antral region of guinea-pig  
802 stomach - A stochastic process. *J Physiol.* 2001;535: 165–180. doi:10.1111/j.1469-  
803 7793.2001.00165.x
- 804 6. Du P, O'Grady G, Paskaranandavivel N, Tang SJ, Abell T, Cheng LK. High-resolution  
805 Mapping of Hyperglycemia-induced Gastric Slow Wave Dysrhythmias. *J*  
806 *Neurogastroenterol Motil.* 2019;25: 276–285. doi:10.5056/jnm18192
- 807 7. Du P, O'Grady G, Gibbons SJ, Yassi R, Lees-Green R, Farrugia G, et al. Tissue-specific  
808 mathematical models of slow wave entrainment in wild-type and 5-HT2B knockout mice  
809 with altered interstitial cells of Cajal networks. *Biophys J.* 2010;98: 1772–1781.  
810 doi:10.1016/j.bpj.2010.01.009
- 811 8. van Helden DF, Imtiaz MS. Ca<sup>2+</sup> phase waves: A basis for cellular pacemaking and  
812 longrange synchronicity in the guinea-pig gastric pylorus. *J Physiol.* 2003;548: 271–296.  
813 doi:10.1113/jphysiol.2002.033720
- 814 9. Cheng LK, Komuro R, Austin TM, Buist ML, Pullan AJ. Anatomically realistic multiscale  
815 models of normal and abnormal gastrointestinal electrical activity. *World J Gastroenterol.*  
816 2007;13: 1378–1383. doi:10.3748/wjg.v13.i9.1378
- 817 10. O'Grady G, Egbuji JU, Du P, Lammers WJEP, Cheng LK, Windsor JA, et al. High-  
818 resolution spatial analysis of slow wave initiation and conduction in porcine gastric  
819 dysrhythmia. *Neurogastroenterol Motil.* 2011;23: 345–355. doi:10.1111/j.1365-  
820 2982.2011.01739.x
- 821 11. Mandal UK, Chatterjee B, Senjoti FG. Gastro-retentive drug delivery systems and their in  
822 vivo success: A recent update. *Asian J Pharm Sci.* 2016;11: 575–584.  
823 doi:<https://doi.org/10.1016/j.ajps.2016.04.007>
- 824 12. Camborová P, Hubka P, Sulková I, Hulín I. The pacemaker activity of interstitial cells of  
825 Cajal and gastric electrical activity. *Physiol Res.* 2003;52: 275—284. Available:  
826 <http://europepmc.org/abstract/MED/12790758>
- 827 13. Hirst GDS, Beckett EAH, Sanders KM, Ward SM. Regional variation in contribution of  
828 myenteric and intramuscular interstitial cells of Cajal to generation of slow waves in  
829 mouse gastric antrum. *J Physiol.* 2002;540: 1003–1012.  
830 doi:10.1113/jphysiol.2001.013672

- 831 14. Hirst GDS, Edwards FR. Electrical events underlying organized myogenic contractions of  
832 the guinea pig stomach. *J Physiol.* 2006;576: 659–665. doi:10.1113/jphysiol.2006.116491
- 833 15. Seki K, Komuro T. Distribution of interstitial cells of Cajal and gap junction protein, Cx 43  
834 in the stomach of wild-type and W/Wv mutant mice. *Anat Embryol (Berl).* 2002;206: 57–  
835 65. doi:10.1007/s00429-002-0279-0
- 836 16. Komuro T, Seki K, Horiguchi K. Ultrastructural characterization of the interstitial cells of  
837 Cajal. *Archives of Histology and Cytology.* 1999. pp. 295–316. doi:10.1679/aohc.62.295
- 838 17. Cousins HM, Edwards FR, Hickey H, Hill CE, Hirst GDS. Electrical coupling between the  
839 myenteric interstitial cells of Cajal and adjacent muscle layers in the guinea-pig gastric  
840 antrum. *J Physiol.* 2003;550: 829–844. doi:10.1113/jphysiol.2003.042176
- 841 18. Imtiaz MS, Von Der Weid PY, Van Helden DF. Synchronization of Ca<sup>2+</sup> oscillations: A  
842 coupled oscillator-based mechanism in smooth muscle. *FEBS J.* 2010;277: 278–285.  
843 doi:10.1111/j.1742-4658.2009.07437.x
- 844 19. Buist ML, Corrias A, Poh YC. A model of slow wave propagation and entrainment along  
845 the stomach. *Ann Biomed Eng.* 2010;38: 3022–3030. doi:10.1007/s10439-010-0051-1
- 846 20. Van Helden DF, Imtiaz MS, Nurgaliyeva K, Von Der Weid PY, Dosen PJ. Role of calcium  
847 stores and membrane voltage in the generation of slow wave action potentials in guinea-  
848 pig gastric pylorus. *J Physiol.* 2000;524: 245–265. doi:10.1111/j.1469-7793.2000.00245.x
- 849 21. Radebold K, Horakova E, Gloeckner J, Ortega G, Spray DC, Vieweger H, et al. Gap  
850 junctional channels regulate acid secretion in the mammalian gastric gland. *J Membr Biol.*  
851 2001;183: 147–153. doi:10.1007/s00232-001-0062-9
- 852 22. Clair C, Chalumeau C, Tordjmann T, Poggioli J, Erneux C, Dupont G, et al. Investigation  
853 of the roles of Ca<sup>2+</sup> and InsP<sub>3</sub> diffusion in the coordination of Ca<sup>2+</sup> signals between  
854 connected hepatocytes. *J Cell Sci.* 2001;114: 1999–2007.
- 855 23. Carter TD, Chen XY, Carlile G, Kalapothakis E, Ogden D, Evans WH. Porcine aortic  
856 endothelial gap junctions: Identification and permeation by caged InsP<sub>3</sub>. *J Cell Sci.*  
857 1996;109: 1765–1773.
- 858 24. Koenigsberger M, Sauser R, Lamboley M, Bény JL, Meister JJ. Ca<sup>2+</sup> dynamics in a  
859 population of smooth muscle cells: Modeling the recruitment and synchronization.  
860 *Biophys J.* 2004;87: 92–104. doi:10.1529/biophysj.103.037853
- 861 25. Isakson BE, Ramos SI, Duling BR. Ca<sup>2+</sup> and inositol 1,4,5-trisphosphate-mediated  
862 signaling across the myoendothelial junction. *Circ Res.* 2007;100: 246–254.  
863 doi:10.1161/01.RES.0000257744.23795.93
- 864 26. Ward SM, Sanders KM. Interstitial cells of Cajal: Primary targets of enteric motor  
865 innervation. *Anat Rec.* 2001;262: 125–135. doi:10.1002/1097-  
866 0185(20010101)262:1<125::AID-AR1017>3.0.CO;2-I
- 867 27. Poggioli J, Sulpice JC, Vassort G. Inositol phosphate production following  $\alpha$ 1-adrenergic,  
868 muscarinic or electrical stimulation in isolated rat heart. *FEBS Lett.* 1986;206: 292–298.



- 869 doi:10.1016/0014-5793(86)80999-1
- 870 28. Canonico PL, Jarvis WD, Angela Sortino M, Scapagnini U, MacLeod RM. Cholinergic  
871 stimulation of inositol phosphate production in cultured anterior pituitary cells.  
872 *Neuroendocrinology*. 1987;46: 306–311. doi:10.1159/000124837
- 873 29. Macara B, Gião-T. Rico JM. Effect of Ca<sup>2+</sup> modulators on acetylcholine-induced phasic  
874 and tonic contractions and A23187-induced contractions in ileal longitudinal muscle and  
875 IP<sub>3</sub> production. *Eur J Pharmacol*. 1992;218: 27–33. doi:10.1016/0014-2999(92)90143-R
- 876 30. Cohen AH, Holmes PJ, Rand RH. The nature of the coupling between segmental  
877 oscillators of the lamprey spinal generator for locomotion: A mathematical model. *J Math*  
878 *Biol*. 1982;13: 345–369. doi:10.1007/BF00276069
- 879 31. Kopell N, Ermentrout GB. Coupled oscillators and the design of central pattern  
880 generators. *Math Biosci*. 1988;90: 87–109. doi:https://doi.org/10.1016/0025-  
881 5564(88)90059-4
- 882 32. Winfree AT. Biological rhythms and the behavior of populations of coupled oscillators. *J*  
883 *Theor Biol*. 1967;16: 15–42. doi:https://doi.org/10.1016/0022-5193(67)90051-3
- 884 33. Strogatz SH, Stewart I. Coupled oscillators and biological synchronization. *Sci Am*.  
885 1993;269: 102–109. doi:10.1038/scientificamerican1293-102
- 886 34. Roenneberg T, Dragovic Z, Meroz M. Demasking biological oscillators: Properties and  
887 principles of entrainment exemplified by the *Neurospora* circadian clock. *Proc Natl Acad*  
888 *Sci U S A*. 2005;102: 7742–7747. doi:10.1073/pnas.0501884102
- 889 35. Ullah G, Jung P, Cornell-Bell AH. Anti-phase calcium oscillations in astrocytes via inositol  
890 (1, 4, 5)-trisphosphate regeneration. *Cell Calcium*. 2006;39: 197–208.  
891 doi:10.1016/j.ceca.2005.10.009
- 892 36. Sneyd J, Wetton BTR, Charles AC, Sanderson MJ. Intercellular calcium waves mediated  
893 by diffusion of inositol trisphosphate: A two-dimensional model. *Am J Physiol - Cell*  
894 *Physiol*. 1995;268: 537–545. doi:10.1152/ajpcell.1995.268.6.c1537
- 895 37. Valiunas V, White TW. Connexin43 and connexin50 channels exhibit different  
896 permeability to the second messenger inositol triphosphate. *Sci Rep*. 2020;10: 1–10.  
897 doi:10.1038/s41598-020-65761-z
- 898 38. Malysz J, Donnelly G, Huizinga JD. Regulation of slow wave frequency by IP<sub>3</sub>-sensitive  
899 calcium release in the murine small intestine. *Am J Physiol - Gastrointest Liver Physiol*.  
900 2001;280: 439–448. doi:10.1152/ajpgi.2001.280.3.g439
- 901 39. el-Sharkawy TY, Morgan KG, Szurszewski JH. Intracellular electrical activity of canine  
902 and human gastric smooth muscle. *J Physiol*. 1978;279: 291–307.  
903 doi:10.1113/jphysiol.1978.sp012345
- 904 40. Ward SM, Dixon RE, De Faoite A, Sanders KM. Voltage-dependent calcium entry  
905 underlies propagation of slow waves in canine gastric antrum. *J Physiol*. 2004;561: 793–  
906 810. doi:10.1113/jphysiol.2004.076067

- 907 41. Imtiaz MS, Smith DW, Van Helden DF. A theoretical model of slow wave regulation using  
908 voltage-dependent synthesis of inositol 1,4,5-trisphosphate. *Biophys J.* 2002;83: 1877–  
909 1890. doi:10.1016/S0006-3495(02)73952-0
- 910 42. Corrias A, Buist ML. Quantitative cellular description of gastric slow wave activity. *Am J*  
911 *Physiol - Gastrointest Liver Physiol.* 2008;294. doi:10.1152/ajpgi.00528.2007
- 912 43. Corrias A, Buist ML. A quantitative model of gastric smooth muscle cellular activation.  
913 *Ann Biomed Eng.* 2007;35: 1595–1607. doi:10.1007/s10439-007-9324-8
- 914 44. Du P, Li S, O’Grady G, Cheng LK, Pullan AJ, Chen JDZ. Effects of electrical stimulation  
915 on isolated rodent gastric smooth muscle cells evaluated via a joint computational  
916 simulation and experimental approach. *Am J Physiol - Gastrointest Liver Physiol.*  
917 2009;297: 672–680. doi:10.1152/ajpgi.00149.2009
- 918 45. XUE S, VALDEZ DT, TREMBLAY L, COLLMAN PI, DIAMANT NE. Electrical slow wave  
919 activity of the cat stomach: its frequency gradient and the effect of indomethacin.  
920 *Neurogastroenterol Motil.* 1995;7: 157–167. doi:10.1111/j.1365-2982.1995.tb00221.x
- 921 46. De Young GW, Keizer J. A single-pool inositol 1,4,5-trisphosphate-receptor-based model  
922 for agonist-stimulated oscillations in Ca<sup>2+</sup> concentration. *Proc Natl Acad Sci.* 1992;89:  
923 9895 LP – 9899. doi:10.1073/pnas.89.20.9895
- 924 47. Watras J, Bezprozvanny I, Ehrlich BE. Inositol 1,4,5-trisphosphate-gated channels in  
925 cerebellum: Presence of multiple conductance states. *J Neurosci.* 1991;11: 3239–3245.  
926 doi:10.1523/jneurosci.11-10-03239.1991
- 927 48. Li Y-X, Rinzel J. Equations for InsP<sub>3</sub> Receptor-mediated [Ca<sup>2+</sup>]<sub>i</sub> Oscillations Derived  
928 from a Detailed Kinetic Model: A Hodgkin-Huxley Like Formalism. *J Theor Biol.* 1994;166:  
929 461–473. doi:https://doi.org/10.1006/jtbi.1994.1041
- 930 49. Takeda Y, Koh SD, Sanders KM, Ward SM. Differential expression of ionic conductances  
931 in interstitial cells of Cajal in the murine gastric antrum. *J Physiol.* 2008;586: 859–873.  
932 doi:10.1113/jphysiol.2007.140293
- 933 50. Koh SD, Jun JY, Kim TW, Sanders KM. A Ca<sup>2+</sup>-inhibited non-selective cation  
934 conductance contributes to pacemaker currents in mouse interstitial cell of Cajal. *J*  
935 *Physiol.* 2002;540: 803–814. doi:10.1113/jphysiol.2001.014639
- 936 51. Al-Shboul O. The importance of interstitial cells of cajal in the gastrointestinal tract. *Saudi*  
937 *J Gastroenterol.* 2013;19: 3–15. doi:10.4103/1319-3767.105909
- 938 52. Cellini J, DiNovo K, Harlow J, LePard KJ. Regional differences in neostigmine-induced  
939 contraction and relaxation of stomach from diabetic guinea pig. *Auton Neurosci Basic*  
940 *Clin.* 2011;160: 69–81. doi:10.1016/j.autneu.2010.10.006
- 941 53. Vanden Berghe P, Coulie B, Tack J, Mawe GM, Schemann M, Janssens J.  
942 Neurochemical coding of myenteric neurons in the guinea-pig antrum. *Cell Tissue Res.*  
943 1999;297: 81–90. doi:10.1007/s004410051335
- 944 54. Kelly KA, Code CF, Elveback LR. Patterns of canine gastric electrical activity. *Am J*

- 945           Physiol Content. 1969;217: 461–470. doi:10.1152/ajplegacy.1969.217.2.461
- 946   55.   Hirst GDS, Garcia-Londoño AP, Edwards FR. Propagation of slow waves in the guinea-  
947           pig gastric antrum. *J Physiol*. 2006;571: 165–177. doi:10.1113/jphysiol.2005.100735
- 948   56.   Kim CH, Azpiroz F, Malagelada JR. Characteristics of spontaneous and drug-induced  
949           gastric dysrhythmias in a chronic canine model. *Gastroenterology*. 1986;90: 421–427.  
950           doi:10.1016/0016-5085(86)90942-X
- 951   57.   You CH, Chey WY. Study of Electromechanical Activity of the Stomach in Humans and in  
952           Dogs With Particular Attention to Tachygastria. *Gastroenterology*. 1984;86: 1460–1468.  
953           doi:10.1016/S0016-5085(84)80159-6
- 954   58.   Venance L, Piomelli D, Glowinski J, Glaume C. Inhibition by anandamide of gap junctions  
955           and intercellular calcium signalling in striatal astrocytes. *Nature*. 1995;376: 590–594.  
956           doi:10.1038/376590a0
- 957   59.   Parsons SP, Huizinga JD. Spatial noise in coupling strength and natural frequency within  
958           a pacemaker network; consequences for development of intestinal motor patterns  
959           according to a weakly coupled phase oscillator model. *Front Neurosci*. 2016;10.  
960           doi:10.3389/fnins.2016.00019
- 961   60.   O’Grady G, Angeli TR, Du P, Lahr C, Lammers WJEP, Windsor JA, et al. Abnormal  
962           initiation and conduction of slow-wave activity in gastroparesis, defined by high-resolution  
963           electrical mapping. *Gastroenterology*. 2012;143: 589–598.  
964           doi:10.1053/j.gastro.2012.05.036
- 965   61.   Guttman JA, Lin AEJ, Li Y, Bechberger J, Naus CC, Vogl AW, et al. Gap junction  
966           hemichannels contribute to the generation of diarrhoea during infectious enteric disease.  
967           *Gut*. 2010;59: 218–226. doi:10.1136/gut.2008.170464
- 968   62.   Lammers WJEP, Ver Donck L, Schuurkes JAJ, Stephen B. Peripheral pacemakers and  
969           patterns of slow wave propagation in the canine small intestine in vivo. *Can. Can J*  
970           *Physiol Pharmacol*. 2005;83: 1031–1043. doi:10.1139/y05-084
- 971   63.   Lin X, Zemlin C, Hennan JK, Petersen JS, Veenstra RD. Enhancement of ventricular gap-  
972           junction coupling by rotigaptide. *Cardiovasc Res*. 2008;79: 416–426.  
973           doi:10.1093/cvr/cvn100
- 974   64.   Wang THH, Angeli TR, Ishida S, Du P, Gharibans A, Paskaranandavadivel N, et al. The  
975           influence of interstitial cells of Cajal loss and aging on slow wave conduction velocity in  
976           the human stomach. *Physiol Rep*. 2021;8: 1–8. doi:10.14814/phy2.14659
- 977   65.   Publicover NG, Sanders KM. Myogenic regulation of propagation in gastric smooth  
978           muscle. *Am J Physiol - Gastrointest Liver Physiol*. 1985;11.  
979           doi:10.1152/ajpgi.1985.248.5.g512
- 980   66.   Wang THH, Du P, Angeli TR, Paskaranandavadivel N, Erickson JC, Abell TL, et al.  
981           Relationships between gastric slow wave frequency, velocity, and extracellular amplitude  
982           studied by a joint experimental-theoretical approach. *Neurogastroenterol Motil*. 2018;30:  
983           1–9. doi:10.1111/nmo.13152

- 984 67. Kitano H. Biological robustness. *Nat Rev Genet.* 2004;5: 826–837. doi:10.1038/nrg1471
- 985 68. Huizinga JD, Lammers WJEP. Gut peristalsis is governed by a multitude of cooperating  
986 mechanisms. *Am J Physiol - Gastrointest Liver Physiol.* 2009;296: 1–8.  
987 doi:10.1152/ajpgi.90380.2008
- 988 69. Edwards FR, Hirst GDS. An electrical analysis of slow wave propagation in the guinea-  
989 pig gastric antrum. *J Physiol.* 2006;571: 179–189. doi:10.1113/jphysiol.2005.100743
- 990 70. Suzuki H, Hirst GDS. Regenerative potentials evoked in circular smooth muscle of the  
991 antral region of guinea-pig stomach. *J Physiol.* 1999;517: 563–573. doi:10.1111/j.1469-  
992 7793.1999.0563t.x
- 993 71. Sanders KM. Rhythmic electrical activity and regulation of gut motility. *Eur Rev Med*  
994 *Pharmacol Sci.* 2008;12 Suppl 1: 129–131.
- 995 72. Fink M, Noble D. Markov models for ion channels: versatility versus identifiability and  
996 speed. *Philos Trans R Soc A Math Phys Eng Sci.* 2009;367: 2161–2179.  
997 doi:10.1098/rsta.2008.0301
- 998 73. Park KJ, Hennig GW, Lee HT, Spencer NJ, Ward SM, Smith TK, et al. Spatial and  
999 temporal mapping of pacemaker activity in interstitial cells of Cajal in mouse ileum in situ.  
1000 *Am J Physiol - Cell Physiol.* 2006;290: 1411–1427. doi:10.1152/ajpcell.00447.2005
- 1001 74. Döring B, Pfitzer G, Adam B, Liebrechts T, Eckardt D, Holtmann G, et al. Ablation of  
1002 connexin43 in smooth muscle cells of the mouse intestine: Functional insights into  
1003 physiology and morphology. *Cell Tissue Res.* 2007;327: 333–342. doi:10.1007/s00441-  
1004 006-0281-6
- 1005 75. Harris AL. Connexin channel permeability to cytoplasmic molecules. *Prog Biophys Mol*  
1006 *Biol.* 2007;94: 120–143. doi:10.1016/j.pbiomolbio.2007.03.011
- 1007 76. Weber PA, Chang HC, Spaeth KE, Nitsche JM, Nicholson BJ. The permeability of gap  
1008 junction channels to probes of different size is dependent on connexin composition and  
1009 permeant-pore affinities. *Biophys J.* 2004;87: 958–973. doi:10.1529/biophysj.103.036350
- 1010 77. Aliev RR, Richards W, Wikswo JP. A simple nonlinear model of electrical activity in the  
1011 intestine. *J Theor Biol.* 2000;204: 21–28. doi:10.1006/jtbi.2000.1069
- 1012 78. Barth BB, Henriquez CS, Grill WM, Shen X. Electrical stimulation of gut motility guided by  
1013 an in silico model. *J Neural Eng.* 2017;14: 66010. doi:10.1088/1741-2552/aa86c8
- 1014 79. Sneyd J, Charles AC, Sanderson MJ. A model for the propagation of intercellular calcium  
1015 waves. *Am J Physiol - Cell Physiol.* 1994;266: 293–302.  
1016 doi:10.1152/ajpcell.1994.266.1.c293
- 1017 80. Allbritton NL, Meyer T, Stryer L. Range of messenger action of calcium ion and inositol  
1018 1,4,5-trisphosphate. *Science (80- ).* 1992;258: 1812–1815. doi:10.1126/science.1465619
- 1019 81. Moshkforoush A, Balachandar L, Moncion C, Montejo KA, Riera J. Unraveling ChR2-  
1020 driven stochastic Ca<sup>2+</sup> dynamics in astrocytes: A call for new interventional paradigms.

- 1021 PLOS Comput Biol. 2021;17: e1008648. doi:10.1371/journal.pcbi.1008648
- 1022 82. Ermentrout GB, Kopell N. Frequency Plateaus in a Chain of Weakly Coupled Oscillators,  
1023 I. SIAM J Math Anal. 1984;15: 215–237. doi:10.1137/0515019
- 1024 83. Furness JB, Jones C, Nurgali K, Clerc N. Intrinsic primary afferent neurons and nerve  
1025 circuits within the intestine. Prog Neurobiol. 2004;72: 143–164.  
1026 doi:10.1016/j.pneurobio.2003.12.004
- 1027 84. Irisawa H, Brown HF, Giles W. Cardiac pacemaking in the sinoatrial node. Physiol Rev.  
1028 1993;73: 197–227. doi:10.1152/physrev.1993.73.1.197
- 1029 85. Ahmed MA, Jung R. Modeling of Slow Waves in the Stomach BT - Encyclopedia of  
1030 Computational Neuroscience. Jaeger D, Jung R, editors. New York, NY: Springer New  
1031 York; 2020. pp. 1–9. doi:10.1007/978-1-4614-7320-6\_100704-1
- 1032 86. Fall CP, Keizer JE. Mitochondrial modulation of intracellular Ca<sup>2+</sup> signaling. J Theor Biol.  
1033 2001;210: 151–165. doi:10.1006/jtbi.2000.2292
- 1034 87. Höfer T. Model of intercellular calcium oscillations in hepatocytes: Synchronization of  
1035 heterogeneous cells. Biophys J. 1999;77: 1244–1256. doi:10.1016/S0006-  
1036 3495(99)76976-6
- 1037
- 1038
- 1039

1040 **Supporting information**

1041 **S1 Table. Summary of published models for a gastric slow-wave in the stomach.**

| Model                 | Nature of modeling       | Single ICC cell | Single ICC SM cell | ICC chain (1-D) | ICC+S M cell network (2-D) | Enteric neuron network | Comparison with Experimental data |              |                            | IP <sub>3</sub> Dynamic | Gap junction connectivity                                   |
|-----------------------|--------------------------|-----------------|--------------------|-----------------|----------------------------|------------------------|-----------------------------------|--------------|----------------------------|-------------------------|-------------------------------------------------------------|
|                       |                          |                 |                    |                 |                            |                        | Animal model                      | Intact freq. | Intrinsic freq.            |                         |                                                             |
| Corrias & Buist, 2008 | Biophysical              | √               | ×                  | ×               | ×                          | ×                      | Guinea-pig antrum                 | N/A          | √                          | N/A                     | N/A                                                         |
| Corrias & Buist, 2007 | Biophysical              | ×               | √                  | ×               | ×                          | ×                      | Canine antrum SMC                 | N/A          | √                          | N/A                     | N/A                                                         |
| Peng Du, 2010         | Biophysical              | √               | ×                  | √               | ×                          | ×                      | Simulated in mouse jejunum        | N/A          | N/A                        | Dynamic IP <sub>3</sub> | Electrical                                                  |
| Buist, 2010           | Biophysical              | √               | √                  | √               | √                          | ×                      | Guinea-pig stomach SMC            | ×            | Antrum- (√)<br>Corpus- (×) | Static IP <sub>3</sub>  | Electrical                                                  |
| Aliev, 2000           | Coupled chain oscillator | √               | √                  | √               | √                          | ×                      | Canine intestine                  | √            | √                          | N/A                     | Electrical                                                  |
| Edwards, 2006         | Electrical               | √               | √                  | √               | √                          | ×                      | Guinea-pig antrum SMC             | N/A          | √                          | N/A                     | Electrical                                                  |
| Barth, 2017           | Electrical+ Biophysical  | √               | √                  | √               | √                          | √                      | Rat colon                         | N/A          | N/A                        | N/A                     | Electrical, synaptic and neuromuscular                      |
| Van Helden, 2003      | Lumped biophysical       | √               | ×                  | √               | ×                          | ×                      | Guinea-pig pylorus SMC            | N/A          | N/A                        | Dynamic IP <sub>3</sub> | Electrical & Chemical (Ca <sup>2+</sup> & IP <sub>3</sub> ) |
| Our model             | Biophysical              | √               | √                  | √               | √                          | ×                      | Cat & dog stomach                 | √            | Antrum- (√)<br>Corpus- (√) | Dynamic IP <sub>3</sub> | Electrical & Chemical (Ca <sup>2+</sup> & IP <sub>3</sub> ) |

1042 **S2 Table. Total Lag under different values of  $G_{ICC-ICC}$ .** Mean  $\pm$  standard deviation for the last  
1043 7 cycles in each simulation.

| <b><math>G_{ICC-ICC}</math> value (nS)</b> | <b>Total Lag (sec)</b> |
|--------------------------------------------|------------------------|
| 0.35                                       | 53.77 $\pm$ 3.63       |
| 0.53                                       | 21.99 $\pm$ 0.02       |
| 0.7                                        | 20.85 $\pm$ 0.02       |
| 1.05                                       | 19.27 $\pm$ 0.03       |
| 1.4                                        | 18.22 $\pm$ 0.03       |
| 2.0                                        | 16.93 $\pm$ 0.03       |
| 3.0                                        | 15.51 $\pm$ 0.03       |
| 5.0                                        | 13.81 $\pm$ 0.03       |

1044

1045 **S3 Table. SM Cell Period under different values of  $G_{ICC-ICC}$ .** Mean  $\pm$  standard deviation for the  
1046 last 7 cycles in each simulation.

| <b><math>G_{ICC-ICC}</math> value (nS)</b> | <b>SM<sub>1</sub> Period (sec)</b> | <b>SM<sub>42</sub> Period (sec)</b> |
|--------------------------------------------|------------------------------------|-------------------------------------|
| 0.35                                       | 17.75 $\pm$ 0.01                   | 19.41 $\pm$ 0.44                    |
| 0.53                                       | 17.75 $\pm$ 0.01                   | 17.74 $\pm$ 0.03                    |
| 0.7                                        | 17.74 $\pm$ 0.01                   | 17.73 $\pm$ 0.01                    |
| 1.05                                       | 17.70 $\pm$ 0.01                   | 17.69 $\pm$ 0.01                    |
| 1.4                                        | 17.67 $\pm$ 0.01                   | 17.66 $\pm$ 0.01                    |
| 2.0                                        | 17.64 $\pm$ 0.01                   | 17.62 $\pm$ 0.01                    |
| 3.0                                        | 17.59 $\pm$ 0.01                   | 17.58 $\pm$ 0.01                    |
| 5.0                                        | 17.52 $\pm$ 0.01                   | 17.51 $\pm$ 0.01                    |

1047

1048

1049 **S4 Table. Total Lag under different values of  $P_{IP3}$ .** Mean  $\pm$  standard deviation for the last 7  
1050 cycles in each simulation.

| <b><math>P_{IP3}</math> value (<math>\text{sec}^{-1}</math>)</b> | <b>Total Lag (sec)</b> |
|------------------------------------------------------------------|------------------------|
| 4.0                                                              | 69.56 $\pm$ 2.45       |
| 6.0                                                              | 53.99 $\pm$ 4.03       |
| 8.0                                                              | 20.85 $\pm$ 0.02       |
| 12.0                                                             | 16.85 $\pm$ 0.03       |
| 16.0                                                             | 13.17 $\pm$ 0.03       |
| 20.0                                                             | 10.92 $\pm$ 0.02       |
| 30.0                                                             | 8.90 $\pm$ 0.01        |
| 40.0                                                             | 7.93 $\pm$ 0.03        |

1051

1052 **S5 Table. SM Cell Period under different values of  $P_{IP3}$ .** Mean  $\pm$  standard deviation for the last  
1053 7 cycles in each simulation.

| <b><math>p_{IP3}</math> value (<math>\text{sec}^{-1}</math>)</b> | <b>SM<sub>1</sub> Period (sec)</b> | <b>SM<sub>42</sub> Period (sec)</b> |
|------------------------------------------------------------------|------------------------------------|-------------------------------------|
| 4.0                                                              | 17.31 $\pm$ 0.01                   | 18.44 $\pm$ 0.34                    |
| 6.0                                                              | 17.53 $\pm$ 0.02                   | 19.31 $\pm$ 0.59                    |
| 8.0                                                              | 17.74 $\pm$ 0.01                   | 17.73 $\pm$ 0.01                    |
| 12.0                                                             | 17.94 $\pm$ 0.01                   | 17.92 $\pm$ 0.01                    |
| 16.0                                                             | 18.31 $\pm$ 0.01                   | 18.30 $\pm$ 0.01                    |
| 20.0                                                             | 18.58 $\pm$ 0.01                   | 18.57 $\pm$ 0.01                    |
| 30.0                                                             | 18.69 $\pm$ 0.02                   | 18.69 $\pm$ 0.01                    |
| 40.0                                                             | 18.71 $\pm$ 0.03                   | 18.69 $\pm$ 0.02                    |



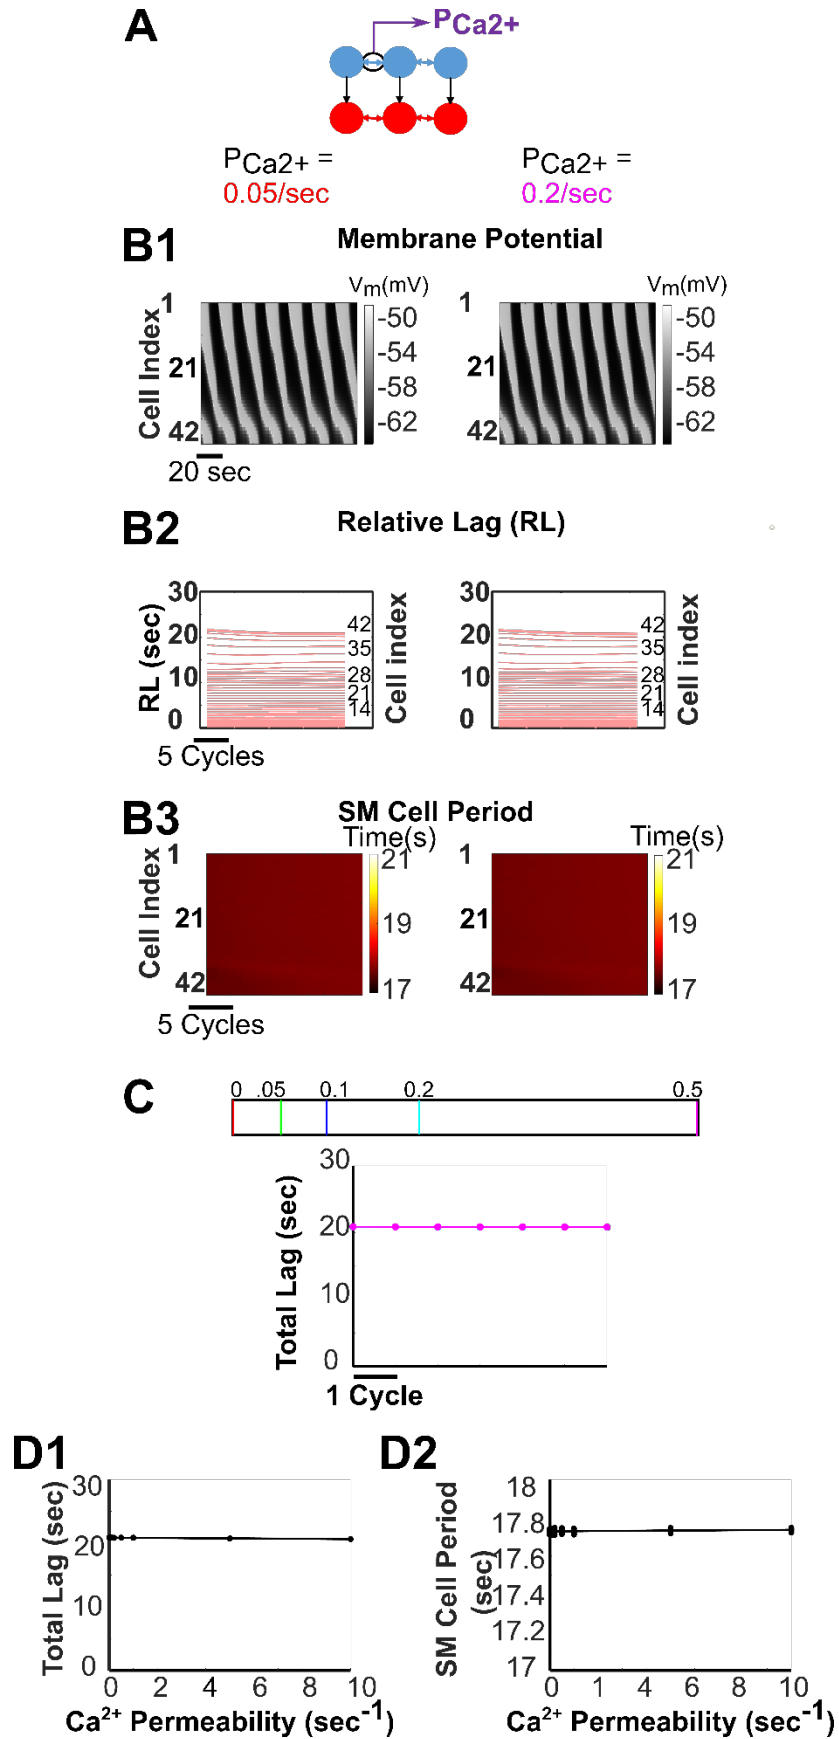

1055 **S6 Fig. Increasing  $\text{Ca}^{2+}$  permeability across ICC-ICC gap junctions has no impact on network**  
1056 **behavior. (A)** The network. **(B)** Spatiotemporal map of membrane potential **(B1)**, *Relative Lags* **(B2)**, and  
1057 spatiotemporal map of *SM Cell Periods* **(B3)** for the network when  $P_{\text{Ca}^{2+}} = 0.05 \text{ sec}^{-1}$  (left panel diagrams)  
1058 and  $0.2 \text{ sec}^{-1}$  (right panel diagrams). **(C)** The *Total Lags* for changes in  $P_{\text{Ca}^{2+}}$  are shown for the last 7 cycles  
1059 of 900-sec simulations. The corresponding values of these permeabilities in  $\text{sec}^{-1}$  are shown in the legend.  
1060 **(D)** For several networks, the mean *Total Lag* **(D1)** and the *SM Cell Period* **(D2)** of the last 7 cycles for each  
1061 network with respect to its  $P_{\text{Ca}^{2+}}$  are fit by an approximately constant line.

1062

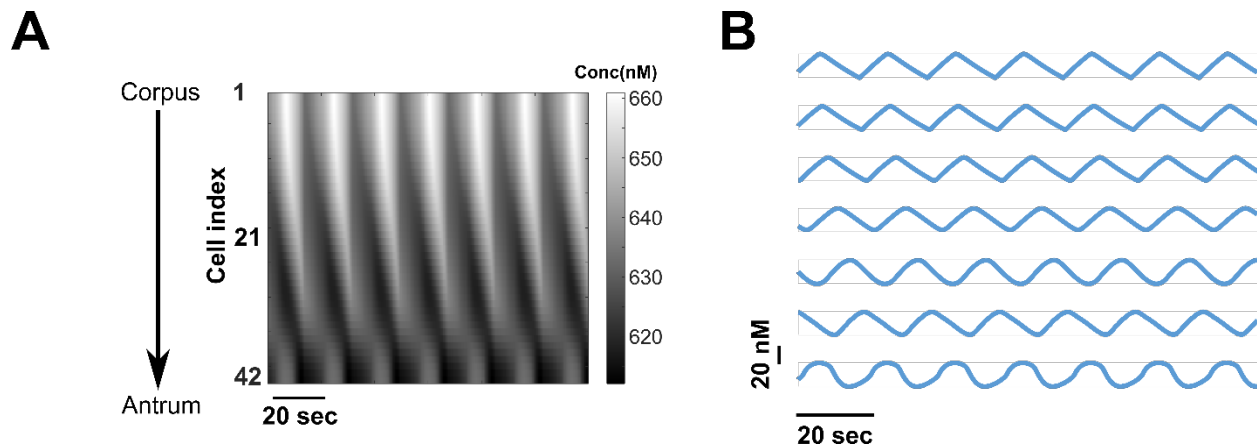

1063

1064 **S7 Fig. Spatiotemporal change in intracellular  $\text{IP}_3$  concentration. (A)** Heatmap for all the cells in the  
1065 network, and **(B)** for every 7<sup>th</sup> cell in the network in steady-state.

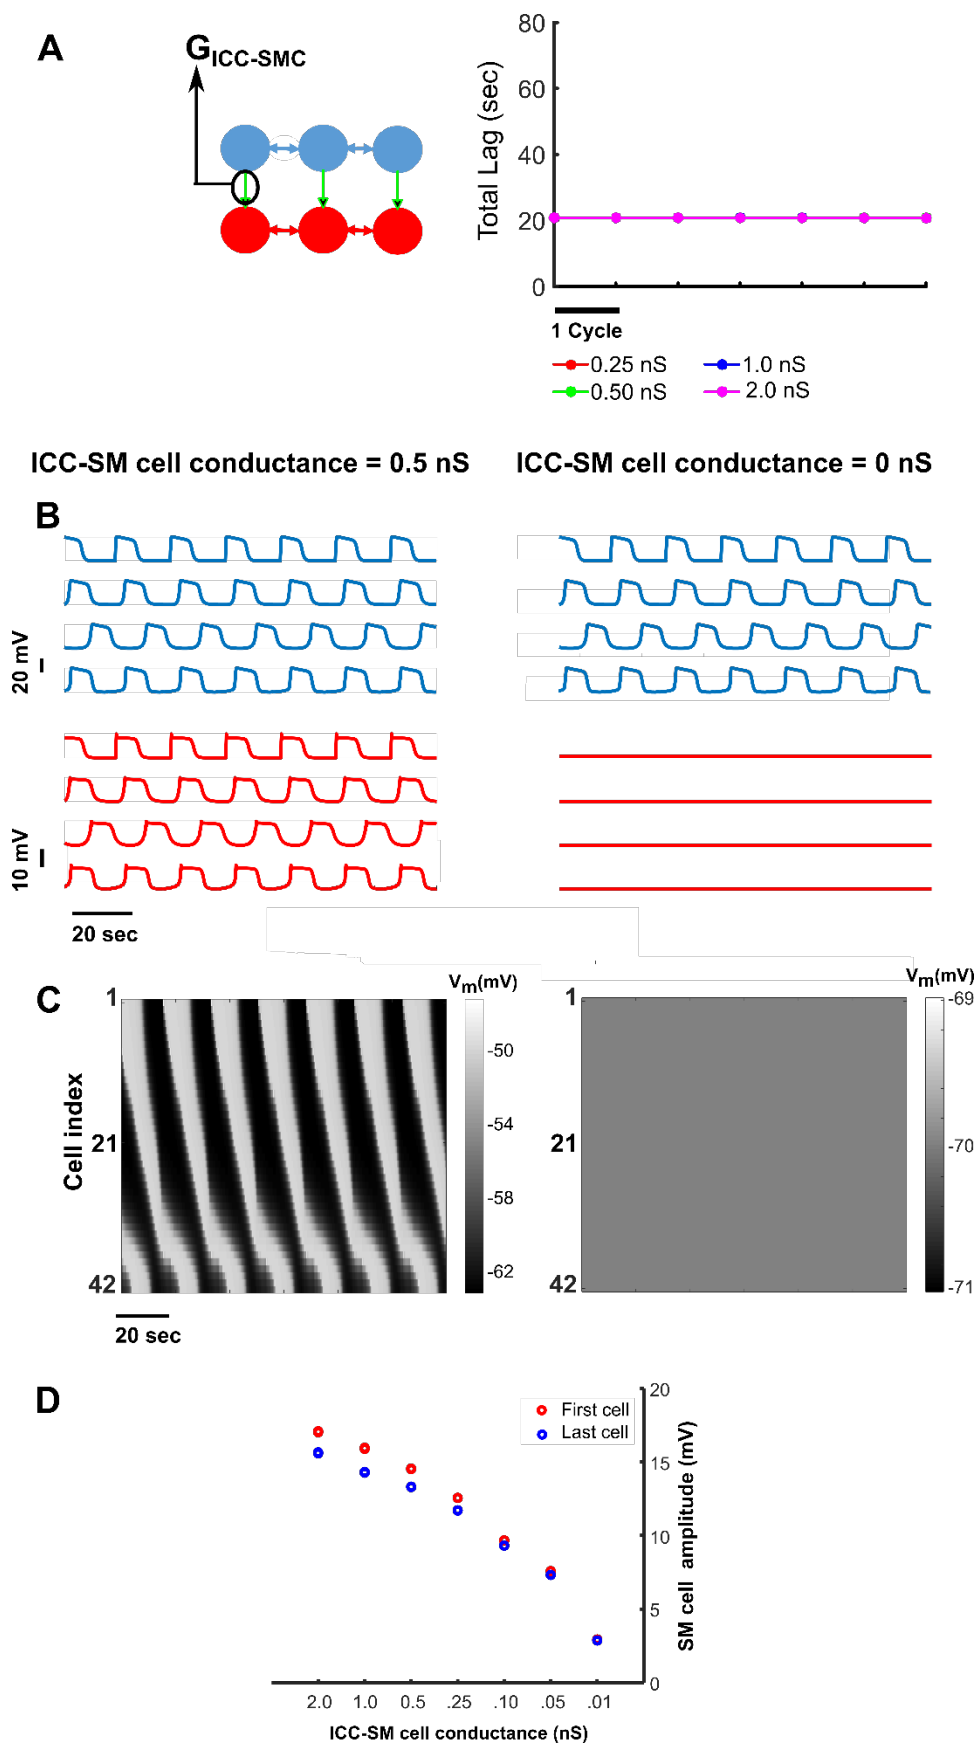

1067 **S8 Fig. The ICC-SM cell gap junction conductance impacts the SM cell membrane potential**  
1068 **amplitude. (A)** ICC-SM cell electrical conductance does not have any effect on network entrainment  
1069 evident from the approximately equal values of *Total Lag* measured for 4 different values of ICC-SM cell  
1070 electrical conductances. **(B)** Membrane potential of 4 equidistant ICCs (top diagrams) and SM cells  
1071 (bottom panel diagrams) in the 42-cell network when ICC-SM cell conductance is 0.5 nS (**left**) and 0 nS  
1072 (**right**). **(C)** Spatiotemporal map of membrane potential of all 42 SM cells of the network, where ICC-SM  
1073 cell conductance is 0.5 nS (**left**) and 0 nS (**right**). **(D)** Reduction of ICC to SM cell gap junction  
1074 conductance reduces the amplitude of SM cell membrane potentials. For representation purposes, here  
1075 the amplitudes (the peak-to-valley) of membrane potentials of the first and last SM cells of the network  
1076 are shown.

1077
